1 Lipid digestion and autophagy are critical energy providers during  
2 acute glucose depletion in *Saccharomyces cerevisiae*

3

4 Carmen A. Weber<sup>1,\*</sup>, Karthik Sekar<sup>2,\*</sup>, Jeffrey H. Tang<sup>1</sup>, Philipp Warmer<sup>2</sup>, Uwe Sauer<sup>2</sup>, Karsten  
5 Weis<sup>\*\*,1</sup>

6

7 <sup>1</sup>Institute of Biochemistry, Department of Biology, ETH Zurich, 8093 Zurich, Switzerland.

8 <sup>2</sup>Institute of Molecular Systems Biology, Department of Biology, ETH Zurich, 8093 Zurich,  
9 Switzerland.

10 \* equal contribution

11 \*\*To whom correspondence should be addressed: karsten.weis@bc.biol.ethz.ch

12

13 Competing interests: The authors have declared that no competing interests exist.

14 **Abstract**

15 The ability to tolerate and thrive in diverse environments is paramount to all living  
16 organisms, and many organisms spend a large part of their lifetime in starvation. Upon acute  
17 glucose starvation, yeast cells undergo drastic physiological and metabolic changes and  
18 reestablish a constant - though lower – level of energy production within minutes. The  
19 molecules that are rapidly metabolized to fuel energy production under these conditions are  
20 unknown. Here, we combine metabolomics and genetics, to characterize the cells' response  
21 to acute glucose depletion and identify pathways that ensure survival during starvation. We  
22 show that the ability to respire is essential for maintaining the energy status and to ensure  
23 viability during starvation. Measuring the cells' immediate metabolic response, we find that  
24 central metabolites drastically deplete and that the intracellular AMP to ATP ratio strongly  
25 increases within 20-30 seconds. Furthermore, we detect changes in both amino acid and  
26 lipid metabolite levels. Consistent with this, bulk autophagy, a process that frees amino  
27 acids, as well as lipid degradation via  $\beta$ -oxidation contribute in parallel to energy  
28 maintenance upon acute starvation. In addition, both these pathways ensure long-term  
29 survival during starvation. Thus, our results identify bulk autophagy and  $\beta$ -oxidation as  
30 important energy providers during acute glucose starvation.

31

32

## 33 Introduction

34 Cellular life depends on metabolic substrates for growth and survival. Glucose is a common  
35 substrate and convenient energy source that feeds directly into glycolysis, leading to rapid  
36 cell growth and proliferation in many microbes. Budding yeast, for example, depend highly  
37 on glucose as an energy source for rapid growth. One of their evolutionary advantages is  
38 that they can outgrow many of their competitors when supplied with glucose. The  
39 dependence on glucose and the ability to respond to glucose starvation is not only common  
40 in microbes and unicellular organisms, but also pertains to multicellular eukaryotes. A large  
41 number of cancer cells for instance rely mostly on glucose and glycolysis even when oxygen  
42 is present (i.e. the Warburg effect), which leads to outcompeting of non-cancerous cells in  
43 terms of proliferation. Not only cancerous cells rely predominantly on glucose, but also  
44 healthy cell types such as neurons, which depend exclusively on glucose as their energy  
45 source. Interestingly, energy deficits and low glucose levels have been correlated with  
46 neurodegenerative diseases such as Alzheimer's (1–3). Thus, understanding how cells cope  
47 with starvation is crucial for elucidating both normal cellular processes as well as aberrant  
48 behaviors in disease.

49

50 In microbes such as the budding yeast *Saccharomyces cerevisiae*, starvation is especially  
51 ubiquitous (4), and must be counteracted very rapidly. Budding yeast have developed an  
52 intricate and rapid response to glucose starvation, including reduction of transcriptional and  
53 translational activity (5–7), autophagy of cytoplasmic components and lipids for energetic  
54 needs (8), and reduction of macromolecular diffusivity (9, 10). Starvation states can differ  
55 depending on the type of starvation or nutrient limitation (11).

56

57 Previous studies have predominantly focused on starvation-induced metabolic changes that  
58 occur over hours or longer (8, 12, 13) . Yet, metabolic pools rapidly deplete and fill within  
59 seconds (14, 15) and any initial responses have likely been missed in these studies.  
60 Furthermore, metabolic changes can occur much faster than transcriptional and protein  
61 abundance changes (16), and metabolism is therefore likely amongst the first responders to  
62 changes in the environment. However, the rapid metabolic changes that occur at the onset  
63 of starvation have remained unclear, and the critical energy sources that are utilized upon  
64 acute glucose starvation – leading to a new energy equilibrium within minutes (9) - have not  
65 been well characterized. Additionally, it is poorly understood how metabolism  
66 communicates with the rest of the cell to ensure long-term survival.

67

68 To begin to address some of these questions, we performed a metabolomic analysis upon  
69 acute glucose starvation in budding yeast. Our results reveal that upper glycolysis  
70 metabolites deplete within seconds of acute glucose starvation while intracellular lipid pools  
71 increase or are maintained. In addition, we found that the metabolic flow through amino  
72 acid metabolites changes significantly. Based on these findings we assessed the effect of  
73 lipid digestion and autophagy on the cellular energy status upon acute glucose starvation  
74 and found that lipid degradation and autophagy act together to ensure ATP maintenance as  
75 well as cellular survival in acute glucose starvation.

76

77



## 78 Results

79 Respiration is crucial for survival and energy maintenance upon acute glucose  
80 starvation.

81 Our previous results suggested that respiration is critical for energy production upon acute  
82 glucose withdrawal (9). To address this question of how important respiration activity is for  
83 the acute glucose starvation response we genetically deleted *CBP2* in order to abolish  
84 aerobic respiration. The *CBP2* gene product facilitates the splicing of the cytochrome B  
85 oxidase pre-RNA (17). Therefore, a knockout of *CBP2* inhibits the ability of cells to respire. In  
86 *cbp2Δ* mutants, intracellular ATP levels dropped to non-detectable levels within 1 h of acute  
87 glucose starvation and remained immeasurable until 19 h. Furthermore, the survival rate in  
88 the absence of glucose was dramatically reduced compared to the wild-type (Figure 1a). This  
89 showed that respiratory activity is critical to provide the necessary energy to promote  
90 survival during starvation.

91

92 Metabolite pools deplete globally within 1 h of starvation in cells unable to respire.

93 Having established that respiration is required for energy maintenance and survival upon  
94 glucose starvation (Figure 1a), we next aimed to identify the substrate(s) feeding respiration  
95 in these conditions. We hypothesized that respiration substrates cannot be efficiently  
96 metabolized in a respiration-deficient mutant and hence might accumulate in these cells. We  
97 therefore measured and compared central carbon metabolites between wild-type and  
98 *cbp2Δ* cells on a time scale of 1-4 h of starvation (Figure 1b, Figure S1). A large swath of  
99 intracellular metabolites exhibited similar depletion patterns between the two strains,  
100 including many central metabolites in glycolysis (e.g. glycerol-phosphate, fructose-

101 bisphosphate, and glucose-6-phosphate) and in the citric acid cycle (e.g. acetyl-CoA,  
102 glutamate, glutamine). Some select metabolites, such as glucose-6-phosphate, acetyl-CoA,  
103 ribose-5-phosphate, and glutamate, depleted more completely in the *cbp2Δ* mutants  
104 compared to wild-type, and others, including sedoheptulose-7- guanine,  
105 phosphoenolpyruvate, and UDP-hexose, diminished entirely during glucose starvation in  
106 *cbp2Δ* but remained constant or even accumulated in wild-type cells. However, we could not  
107 detect any intracellular metabolite that specifically accumulated in *cbp2Δ* cells upon glucose  
108 starvation. We conclude that intracellular metabolite pools deplete rapidly in both wild-type  
109 and respiration deficient cells, and do so even more rapidly or more completely if cells are  
110 unable to respire.

111

112 [Maintenance of ATP levels and increased survival under acute glucose starvation are](#)  
113 [neither explained by extracellular amino acids nor intracellular glycogen.](#)

114 Our initial analyses of intracellular metabolites did not provide us with obvious candidates  
115 fueling respiration that became apparent through accumulation in a respiration deficient  
116 mutant. We next focused our attention on candidate substrates during starvation, namely  
117 extracellular metabolites as well as intracellular glycogen reserves.

118 Extracellular metabolites could either be used as an external energy source or point to the  
119 activity of intracellular pathways based on secreted metabolites. To examine changes in  
120 extracellular metabolites, we grew cells to OD 0.5-0.8 in synthetic complete media with  
121 glucose (SCD), essential amino acids, and a yeast nitrogen source (see Materials and  
122 Methods for details). The cells were then acutely starved by washing into the same synthetic  
123 media lacking glucose. The supernatant was sampled before and after the transition, and a

124 control experiment was conducted by washing the cells with SCD to ensure that medium  
125 change itself did not lead to secondary metabolic effects. The strongest effect we observed  
126 was a rapid depletion of extracellular amino acids within the first hour of acute glucose  
127 starvation, specifically, two exemplary amino acids, aspartate and methionine (Figure 2a).  
128 Monitoring their abundances beyond this first hour, no additional appreciable changes could  
129 be observed for up to 19 h. Since our glucose starvation medium contains essential amino  
130 acids, this could suggest that extracellular amino acids are assimilated and catabolized  
131 during acute starvation. To test whether the extracellular amino acids serve as energy  
132 sources on a short time scale during glucose starvation, we measured intracellular ATP levels  
133 within the uptake period of 1 h or within longer starvation up to 19 h in cells starved from  
134 glucose (SC), starved from glucose and amino acids (SC-AA), and cells starved in water (H<sub>2</sub>O)  
135 (Figure 2c). The ATP levels did not drop much lower in water nor in the medium lacking  
136 glucose and amino acids compared to medium only lacking glucose, neither for rapid (30  
137 min-1 h) nor short (19 h) starvation duration.

138

139 To complement the ATP measurements with functional evidence, we also conducted  
140 spotting assays for cells starved in SC media, in SC media without amino acids (SC-AA), and in  
141 water (H<sub>2</sub>O) to assess survival and recovery after the starvation stress. Cells starved from  
142 both glucose and amino acids initially showed no survival difference compared to cells  
143 starved from glucose only (up to day 7 of starvation) and even seemed to have a survival  
144 advantage after 14 days of starvation (Figure 2b, Figure S2). Survival of cells washed into  
145 water instead of SC or SC-AA was only slightly and insignificantly impaired after 14-21 days  
146 compared to the glucose-starved cells (Figure 2b, Figure S2). Although extracellular amino  
147 acids were taken up within 1 h of starvation, we thus conclude that they did neither affect

148 ATP levels upon acute glucose starvation nor provide cells with a survival advantage long-  
149 term.

150

151 Another potential candidate substrate during glucose starvation is intracellular glycogen. In  
152 various starvation conditions, intracellular glycogen resources were proposed to build up or  
153 to be used for energy maintenance (18). Since glycogen was shown to decrease to non-  
154 measurable levels after glucose starvation (19), we tested whether intracellular glycogen  
155 resources sustain ATP maintenance and survival during short-term starvation. However, a  
156 mutant deficient in glycogen synthesis (*glg1Δglg2Δ*) did not adversely affect ATP levels after  
157 1-19 h of acute glucose starvation, and showed no significant survival deficiency even after  
158 21 days (Figure 2d,e, Figure S4). Thus, glycogen stores in the cell are not a main energy  
159 source upon acute glucose starvation.

160

#### 161 [Central carbon metabolites exhibit sub-minute changes to glucose deprivation](#)

162 Our initial survey did not provide us with good candidate substrates that yeast cells utilize to  
163 ensure their survival upon acute glucose starvation, but suggests that many major metabolic  
164 changes occur on a timescale faster than 1 hour. Hence, our experiments thus far might have  
165 missed initial responses that could be important for long term survival. Therefore, we  
166 expanded our metabolomic analyses to earlier time points. Since metabolic pools can  
167 deplete and fill within seconds (14, 15), we aimed for measurements on a 10-60 second  
168 timescale. We employed a high-throughput, untargeted mass spectrometry approach (15,  
169 20) to measure the global, starvation-induced metabolic changes that occur in budding  
170 yeast. Yeast cells were cultivated in SCD media, and using a rapid fast filtration setup (21,

171 22), we dispensed approximately 1 OD unit of yeast on a filter, perfused with SCD media for  
172 at least 10 s followed by exposure to media without glucose (SC) for varying times (10, 20,  
173 30, and 60 s) (Figure 3a). The yeast containing filters were rapidly quenched after the  
174 designated exposure time, and intracellular metabolites were extracted. Relative changes of  
175 intracellular metabolite concentrations were measured and annotated (20). This semi-  
176 quantitative method allowed us to measure the response of approximately 350 ions that can  
177 be associated to 650 metabolites known to the metabolome of *S. cerevisiae* (23). Rapid, fold  
178 changes occurred in many metabolites visualized on a metabolic map (Figure 3b). All  
179 measured ion data is available in Supplementary Data 1.

180

181 How does respiration affect the metabolism at these early time points? To answer this  
182 question, we treated cells with Antimycin A and measured them in parallel with untreated  
183 cells in our fast filtration setup. Antimycin A was chosen as it specifically and rapidly inhibits  
184 the electron transport chain in mitochondria avoiding any potential adaptation effects that  
185 might have occurred in the long-term absence of respiration in *cbp2Δ* cells. An increase of  
186 NADH in Antimycin A treated cells confirmed the successful application of the drug, since the  
187 block of the electron transport chain inhibits NADH oxidation (25) (Figure 3c). Glucose, as  
188 indicated by the hexose ion, decreased within the first 10 seconds in both starvation  
189 conditions, indicating that the cells use up internal glucose very rapidly upon starvation.  
190 Furthermore, the Antimycin A treatment in starvation led to a stronger decrease of most  
191 amino acid pools compared to cells that were only starved (Figure 3c, Figure S3), indicating  
192 that these metabolite pools are either degraded and potentially explored for energy  
193 generation much faster than in cells capable of respiration, or that protein degradation  
194 slows down in Antimycin A treated cells, leading to less generation of amino acids. These

195 observations echoed our earlier observations about respiratory-deficient cells with generally  
196 lower metabolic pools over long time scales.

197 Glycolysis metabolites such as hexose phosphates decreased in both conditions within 10  
198 seconds. Intermediates of the pentose phosphate pathway such as ribose phosphates  
199 (corresponding to the pentose phosphate ion) and potential precursors such as D-ribose  
200 (pentose) also decreased in both conditions, but were then maintained at lower levels in the  
201 untreated cells while they depleted even more in the respiratory deficient condition ([Figure](#)  
202 [3c](#)) correlating with the increased phosphoenolpyruvate levels observed in the *cbp2Δ* cells at  
203 later timepoints ([Figure 1b](#)).

204

205 To further substantiate these observations in wild-type untreated cells, we obtained  
206 absolute metabolite concentrations with a targeted mass-spectrometry method (24) and  
207 found other glycolytic and pentose phosphate pathway metabolites to exhibit a similar rapid  
208 depletion ([Figure 3d](#)), specifically dihydroxyacetone phosphate, glyceraldehyde 3-phosphate,  
209 and fructose bisphosphate. The rapid depletion was comparable to an earlier study,  
210 examining *E. coli* carbon starvation (14). These results suggested that upon removal of the  
211 glucose input downstream metabolic activity continues, leading to the successive depletion  
212 of metabolic pools. Such depletion is expected to start with upper glycolysis metabolites as  
213 the entry point for glucose.

214 The energy charges of the cells (e.g. ATP, ADP, and AMP) showed similar rapid changes  
215 ([Figure 3e](#)). ATP depleted within seconds, and AMP increased in a near equivalent time  
216 frame. Our data suggest that global metabolic changes occur within seconds of starvation.

217 Interestingly, we observed that both intracellular amino acid as well as lipid pools changed  
218 considerably within these initial time points. We therefore focused on these two classes for  
219 our further studies.

220

221 [Autophagy is important for energy maintenance upon acute glucose starvation and](#)  
222 [ensures long-term survival.](#)

223 Since our map of starvation-induced metabolite changes revealed changes of amino acid  
224 metabolites, we examined whether amino acid digestion could provide a pathway for ATP  
225 production through respiration, and whether intracellular proteins, which were synthesized  
226 prior to starvation, could be an amino acid source upon acute glucose removal. Since  
227 proteasomal degradation is one of the main specific protein degradation pathways, we  
228 explored whether proteasomal degradation contributed to ATP generation and maintenance  
229 within 1 h of glucose starvation. To test this, proteasomal activity was blocked using the  
230 small molecular inhibitor MG132. ATP concentrations in MG132-treated cells compared with  
231 the control cells showed no significant changes upon glucose starvation for 1 h ([Figure 4a](#)).  
232 Due to its potential cellular toxicity, we did not test the effect of MG132 on long-term  
233 survival, but our results nevertheless suggest that proteasomal degradation is not a  
234 significant energy source during the first hours of acute starvation.

235

236 Another pathway that frees building blocks and carbon substrates is bulk autophagy, which  
237 removes cytosolic components non-specifically triggering their degradation in the vacuole.  
238 We therefore examined whether bulk autophagy is important for energy maintenance. We  
239 generated a mutant incapable of organizing its pre-autophagosomal structure, *atg2Δ* (31).

240 Since bulk autophagy and the cytoplasm-to-vacuole transport (CvT) pathway largely rely on  
241 the same machinery, including *ATG2*, the *atg2Δ* mutant will affect additionally any specific  
242 process that relies on the CvT for shuttling to the vacuole and degradation therein. ATP  
243 levels after 19 h of glucose starvation were significantly decreased in the *atg2Δ* mutant  
244 compared to WT cells (Figure 4b). In addition, fewer *atg2Δ* cells survived 7 days of glucose  
245 starvation in comparison to the isogenic wild-type control (Figure 4c, Figure S4). Thus, bulk  
246 autophagy as well as specific autophagic processes involving the CvT pathway contributed to  
247 energy maintenance and survival in acute glucose starvation.

248 Our data further implied that there must be alternative pathways to generate ATP in the  
249 short term as autophagy deficiency did not decrease ATP levels to the same levels as seen in  
250 the complete absence of respiration (Figure 4b) and did also not fully impair long term  
251 survival.

252

253 [β-oxidation is required for energy maintenance and survival upon acute glucose](#)  
254 [starvation together with autophagy.](#)

255 In addition to amino acids, lipid metabolite levels changed on these very rapid time scales  
256 and we observed a rapid increase in some lipids in wild-type untreated cells, such as  
257 hexadecanoic acid and 3-oxooctanoyl-CoA (Figure 5a). There are two potential non-exclusive  
258 models that could explain the changes we see. On one hand, since a majority of lipids in the  
259 cell originates from membranes, the observed changes could be caused by global membrane  
260 remodeling during starvation. On the other hand, the cells might liberate lipids to use them  
261 as an energy/carbon source during starvation, leading to an increase of free fatty acyls. To  
262 test the first model, we utilized a lipid extraction method designed for yeast (26) and



263 measured the lipidome over time (Figure 5bc) sampling cells before glucose withdrawal and  
264 every 10 min after. We could annotate over 10,000 ions by exact mass matching to over 400  
265 classes in the 8 categories within the LIPIDS MAPS scheme (27) and classified the different  
266 classes as increasing or decreasing (Figure 5b). In our dataset, the three main membrane  
267 lipid classes (sphingolipids, phospholipids and sterol lipids) were enriched consistent with  
268 the fact that the majority of lipids in cells originates from membranes (28). No major  
269 differences appeared between the lipids measured in control versus glucose starvation  
270 conditions. Nonetheless, a few traces were found to change and particularly, lipids  
271 annotated to dolichols and linear polyketides exhibited an upward trend during starvation  
272 (Figure 5d). While this suggested specific lipids and lipid classes may be synthesized or  
273 depleted in direct response to starvation, the overall lipid composition and therefore cellular  
274 membranes did not seem to appreciably change within rapid time scales (30 min or less).  
275 This argued that yeast cells do not undergo a major membrane remodeling during acute  
276 glucose starvation.

277

278 Since our results did not support the hypothesis that the changes we saw in lipid metabolites  
279 were caused by a major reorganization of cellular membranes, we hypothesized and  
280 examined whether the liberated lipids were used as an energy source to fuel respiration  
281 during starvation.  $\mu$ -lipophagy was recently shown to play a role during long-term glucose  
282 restriction from 2% (w/v) to 0.4% (w/v) glucose (8). The study suggests that lipid droplets are  
283 digested through micro-lipophagy mediated by Atg14 to ensure survival in limiting glucose  
284 conditions. We therefore tested whether  $\mu$ -lipophagy is also necessary for ATP level  
285 maintenance upon acute complete glucose starvation. Within 19 h of starvation, the ATP  
286 levels in *atg14 $\Delta$*  mutants only deviated slightly from values measured in wild-type cells

287 (Figure 6a). However, consistent with the results obtained by Seo et al., acute complete  
288 glucose starvation lead to survival deficiency after 7 days (Figure 6b). We conclude that  $\mu$ -  
289 lipophagy by ATG14 did not contribute significantly to energy maintenance within the first  
290 19 h of acute glucose starvation, but had long term effects on survival of the cells after 7  
291 days.

292

293 While  $\mu$ -lipophagy specifically may only contribute to energy maintenance after the first day  
294 of starvation, general lipid digestion in peroxisomes could play a role early on.  $\beta$ -oxidation  
295 occurs exclusively in peroxisomes in yeast (29). To attenuate global lipid degradation in  
296 peroxisomes, we deleted the gene coding for Pot1. Pot1 is the only 3-ketoacyl-CoA thiolase  
297 in yeast that catalyzes the last step of  $\beta$ -oxidation, producing acetyl-CoA to feed into the  
298 citric acid cycle (30). Indeed, *pot1 $\Delta$*  cells showed decreased ATP levels within 19 h of glucose  
299 starvation, demonstrating that  $\beta$ -oxidation of fatty acids contributes to ATP maintenance  
300 upon glucose starvation (Figure 6a). Furthermore, survival of *pot1 $\Delta$*  cells decreased after 7-  
301 14 days in the absence of glucose (Figure 6bc, Figure S4).

302

303 Together our data suggest that lipid consumption by  $\beta$ -oxidation contributes to intracellular  
304 ATP levels upon acute glucose starvation within several hours of stress, and leads to a  
305 benefit for long term survival. By contrast,  $\mu$ -lipophagy as a more specific way to consume  
306 lipids does not seem to contribute to short-term ATP maintenance, but is important for long  
307 term survival.

308

309 Similar to the results for the autophagy deficient mutant, the ATP and survival levels were  
310 not completely abolished in the *pot1Δ* mutant and did not reach the levels of the respiratory  
311 deficient *cbp2Δ* mutant. We therefore wondered whether bulk autophagy and  $\beta$ -oxidation  
312 might complement each other and generated a *pot1Δatg2Δ* double deletion strain.  
313 Consistent with the hypothesis that the two pathways contribute in an additive manner to  
314 energy generation upon short term glucose starvation, we observed that after 19 h of  
315 starvation the double deletion strain showed lower levels of intracellular ATP than each of  
316 the single deletion mutants (Figure 6ac) and that survival deficiency increased slightly after  
317 14 days of starvation. We conclude that lipid degradation and autophagy work in parallel to  
318 ensure energy maintenance upon glucose starvation.

319

## 320 Discussion

321 Cells commonly experience sudden changes in nutrient availability; therefore, strategies to  
322 overcome nutrient scarcity are critical to ensure survival in periods of starvation. However,  
323 the immediate metabolic response to starvation remains poorly characterized. Here, we  
324 aimed to identify the main immediate energy resources of budding yeast upon acute glucose  
325 starvation. We showed that respiration is needed for survival and energy maintenance upon  
326 glucose starvation, and we examined the metabolic resources that are fed into the  
327 respiratory chain. We found that within seconds of glucose starvation, upper glycolysis  
328 metabolites decrease drastically. Furthermore, we show that autophagy and  $\beta$ -oxidation are  
329 critical energy providers as early as within the first day, and play a central role for survival of  
330 yeast during long term starvation.

331

332 The role of autophagy in starvation for glucose-grown cells is controversial. A few studies  
333 conclude that autophagy is neither activated nor necessary for short-term survival during  
334 starvation (12, 32); whereas, other studies suggest the opposite (8, 33). We observed that  
335 autophagy is essential for cell survival after glucose starvation within 7 days and that ATP  
336 levels depended on autophagy within the first 24h of starvation. While Adachi et al. suggest  
337 that autophagy is not induced within a few hours of glucose starvation, they also show that  
338 within days, autophagy becomes important for survival of these cells. Our data agrees with  
339 the latter, and additionally suggests that energy levels, as measured by ATP, decrease in  
340 autophagy-deficient cells already within 19 h.

341

342 In the respiratory-deficient *cbp2Δ* mutant, we found sedoheptulose-7-guanine (S7P),  
343 guanine, and phosphoenolpyruvate (PEP) to deplete during starvation in direct contrast to  
344 wild-type cells. S7P, guanine, and PEP are all potentially connected through gluconeogenesis,  
345 pentose phosphate pathway, and nucleotide synthesis. Low PEP concentration would  
346 suggest that the *cbp2Δ* mutants have lower gluconeogenic flux (34), which also correlates  
347 with the decreased ribose levels observed for rapid timescales (10-60 sec) in the Antimycin A  
348 treated starved cells. High concentration of PEP is needed in order to drive the pathway to  
349 glucose-6-phosphate and consequently through the pentose phosphate pathway (where S7P  
350 resides) eventuating into nucleotides (e.g. guanine). Gluconeogenic synthesis of PEP is  
351 primarily catalyzed by PEP carboxykinase. In yeast this reaction is driven by GTP hydrolysis.  
352 Given the lower levels of energy cofactors and presumably of energy fluxes in *cbp2Δ* (Figure  
353 1a), the production of PEP by carboxykinase is likely downregulated (35).

354

355 An earlier study concluded that  $\mu$ -lipophagy is triggered by glucose deprivation via the global  
356 energy regulator AMPK (8) within several days of starvation. Yeast AMPK activity is known to  
357 directly correlate with increased AMP/ATP ratio (36). We had observed changes in the  
358 energy charges of the cells (e.g. ATP, ADP, and AMP) (Figure 3e) congruent with the  
359 observations of Seo et al. Strikingly, we measured ATP to deplete within seconds while AMP  
360 increased in a near equivalent time frame. This activity may suggest that AMPK potentially  
361 activates earlier and conveys the intracellular signaling to manage starvation within seconds.  
362 While AMPK signaling has been long studied, the kinetics of induction have not been entirely  
363 revealed (37). Our data open up the possibility that AMPK signaling may be activated within  
364 seconds of starvation.

365

366 One of the expected responses from AMPK signaling is an increase in  $\beta$ -oxidation activity.  
367 While a direct inhibition of Atg14 dependent  $\mu$ -lipophagy did not affect the general energy  
368 status within the first 19 h of starvation, we found that the ability to perform general  $\beta$ -  
369 oxidation is important for ATP maintenance as well as survival in acute glucose starvation,  
370 and that lipid intermediates increase within seconds after glucose starvation. Our lipidomics  
371 dataset suggests that these immediate changes are not due to large-scale membrane  
372 remodeling since we only find that few lipid traces increase upon glucose starvation, in  
373 particular polyketides and dolichols (Figure 5d). Polyketides are a structurally very  
374 heterogeneous class of compounds of which many have been attributed antimicrobial  
375 function (38). The cells might manufacture the polyketides as an antimicrobial measure  
376 during starvation. Less microbial competition for remaining nutrients as well as nutrient  
377 freeing by eliminating potential competitors could be a rational strategy to ensure survival  
378 during starvation.

379

380 The other lipid that increased during 30 min of starvation was dolichol, which is required for  
381 protein glycosylation in the ER (Figure 5d). Here it functions together with UDP-glucose as a  
382 carrier to deliver substrates for glycosylation (39). Interestingly, we also observed the  
383 depletion of UDP-hexose (presumably UDP-glucose) in *cbp2Δ* cells within 1-4 h (Figure 1b). In  
384 *cbp2Δ* cells all potential intracellular energy sources, including UDP-hexoses, might be  
385 drained within hours of starvation due to the lack of efficient energy generation via  
386 respiration, while wild type cells might refrain from degrading metabolites needed for rapid  
387 re-growth after starvation. The increase of dolichol in wild type cells within 30 min of  
388 starvation on the other hand could point to an inhibition of glycosylation upon carbon  
389 starvation. Indeed, previous evidence suggests that the dolichol pathway is transcriptionally  
390 downregulated in response to glucose starvation (40, 41).

391

392 In this manuscript, we sought to better characterize the strategies yeast cells employ as they  
393 enter starvation. Our results show that yeast starvation is multifaceted and entails responses  
394 at many levels (e.g. metabolites, energy level) and pathways (beta-oxidation, autophagy).  
395 We conclude that multiple metabolic responses are needed to ensure sufficient supply of  
396 substrates for respiration as the cells maximize their survivability.

397

398

## 399 Methods

### 400 Strains and growth

401 All strains used in this study have a W303 background, precise genotypes are listed in supplementary  
402 table 1. Yeast strains were grown in SCD medium (synthetic complete with 2% (w/v) glucose,  
403 containing 6.7g/l yeast nitrogen base (Difco) and amino acids according to supplementary table 2) at  
404 pH 5.0 (titrated with HCl/KOH) at 30°C rotating. Gene deletions were performed by homologous  
405 recombination of a PCR amplified cassette encoding antibiotic resistance, functional amino acid  
406 encoding genes, or functional nucleotide encoding genes according to supplementary table 1 (42).

407

### 408 Acute starvation

409 Cells were washed 3 times into SC medium (synthetic complete medium without glucose) by  
410 repeating the following steps three times: 1. centrifuging for 1 min to pellet the cells, 2. removing  
411 supernatant, 3. resuspending the cells in SC medium. Control cells in SCD were treated the same,  
412 washing three times into SCD medium.

413

### 414 ATP measurements

415 ATP measurements were done according to (8) with minor modifications. Cells were pelleted and  
416 resuspended in 750ul 90% acetone. Normalization was done according to OD. The cells were then  
417 incubated at 90°C for approx. 10 min to evaporate the acetone, when about 50ul of solution  
418 remained. 450ul of buffer (10mM Tris pH 8.0, 1mM EDTA) was added to the solution and ATP was  
419 measured with an ATP Determination Kit (Thermo Scientific) on a CLARIOstar microplate reader  
420 (BMG).

421

## 422 Survival assays

423 Cells were acutely starved and incubated at 30°C rotating. Cells were spotted onto YPD plates with  
424 high Adenine, starting at an OD of 0.2, and in a 6-8x dilution series, diluting 5x in every step. The  
425 spotting plates were incubated at 30°C for 1-2 days. Percentages of survival compared to WT were  
426 assessed by counting CFU (colony forming units) per dilution after x days of starvation, compared  
427 with the CFUs counted after the same amount of days in starvation of the wild-type.

428

## 429 MG132 treatment

430 *PDR5* was deleted in all strains used for MG132 drug treatments. Cells were treated with 100 µM  
431 MG132 (Sigma Fluka Aldrich) for 60mins at 30°C before measuring. For MG132 starvation treatment,  
432 cells were pretreated as described with MG132 and then washed 3 times into SC medium containing  
433 MG132.

434

## 435 Fast filtration wash, sampling, and extraction

436 For each measurement, approximately 1 OD unit of cells (OD<sub>600</sub>\*mL) were captured onto filter  
437 paper using a fast filtration set up (21, 22). Immediately, the cells were suffused to flowing pre-  
438 treatment media (SCD media) for at least 10 seconds. Upon media switch, the flow of pre-treatment  
439 media was stopped, and the post-treatment media was followed for a given amount of time (SC  
440 media for 10, 20, 30, and 60 seconds or SCD for 0 and 20 seconds). After the post-treatment media,  
441 the cells and filter paper were immediately quenched in 4 mL of extraction solution of 40:40:20%  
442 acetonitrile: methanol: water at -20°C. The extraction solution with cells were incubated at -20°C  
443 overnight, and the extraction mix was subsequently transferred to 15 ml tubes. The extraction  
444 solvent was evaporated at 0.12 mbar to complete dryness in a SpeedVac setup (Christ, Osterode am  
445 Harz, Germany), and the samples were dissolved in 100 µl of water and transferred to a 96 well plate  
446 for measurement. Samples were stored at -20°C until measurement.



447

#### 448 [Metabolomics measurement and annotation](#)

449 For untargeted analysis ([Figures 3a-c](#)), extracts were measured using FIA-QTOF in negative ionization  
450 mode and annotated to metabolites as described in antecedent study (20). For targeted analysis  
451 ([Figures 1b, 2a, 3de](#)), measurement and analysis is described in previous work (24). For all targeted  
452 analysis measurements, an internal standard of fully labeled C<sup>13</sup> extract was used to normalize all  
453 data (43).

454

#### 455 [Lipidomics extraction](#)

456 For each sampling, approximately 25 OD units of cells (OD<sub>600</sub>\*mL) were captured onto filter paper  
457 using a fast filtration set up. The cells with filter paper were immediately quenched in 10 ml of yeast  
458 lipid extraction solution (15:15:5:1:0.018 % of ethanol, water, diethyl ether, pyridine, and 4.2N  
459 ammonium hydroxide respectively) at -20°C. The extraction solution with cells was incubated at -  
460 20°C overnight, and the extraction mix was subsequently transferred to 15 ml tubes. The extraction  
461 solvent was evaporated using a SpeedVac setup (Christ, Osterode am Harz, Germany), and the  
462 samples were dissolved in 100 µl of 45:45:10 % of isopropanol, methanol, and water respectively and  
463 transferred to glass vials with inserts. Samples were stored at -20°C until measurement.

464

#### 465 [Lipidomics measurement](#)

466 Chromatographic separation and analysis by mass spectrometry was done using a 1200 series HPLC  
467 system with a Phenomenex Kinetex column (1.7 µl × 100 mm × 2.1 mm) with a SecurityGuard Ultra  
468 (Part No: AJ-9000) coupled to an Agilent Technologies 6550 Accurate-Mass Q-Tof. Solvent A: H<sub>2</sub>O,  
469 10mM formic acid; Solvent B: acetonitrile, 10mM formic acid. 10 µl of extract were injected and the  
470 column (C18) was eluted at 1.125 ml/min. Initial conditions were 60% solvent B: 0-2 min, 95% B; 2-4  
471 min, 60% B; 4-5 min at initial conditions. Spectra were collected in negative ionization mode from 50

472 – 3200mz with high resolution at 4 GHz. Continuous infusion of calibrants (Agilent compounds HP-  
473 321, HP-921, HP-1821) ensured exact masses over the whole mass range. We converted the raw data  
474 files to the mzML format using msConvert and processed them in R using the XCMS (ver 3.0.2) and  
475 CAMERA (ver 1.34.0). M-H and M+FA-H ions were annotated using LIPID MAPS (vers. March, 2017)  
476 with a mass tolerance of 0.005 amu (27).

477

## 478 [Acknowledgements](#)

479 We are grateful to the Sauer and Weis laboratory members for feedback and advice. We would like  
480 to thank Elisa Dultz, Stephanie Heinrich, and Ruchika Sachdev for critical reading of the manuscript,  
481 Marieke F. Buffing and Brendan Ryback for fast filtration help, and Marieke F. Buffing and Tobias  
482 Fuhrer for targeted mass spectrometry help. This work was supported by the Swiss National Science  
483 Foundation (SNF 31003A\_179275 to K.W.).

484

## 485 [Author contributions](#)

486 C.W., K.S., U.S., and K.W. conceptualized and organized the project and wrote the manuscript. C.W.  
487 and K.S. cultivated the cells. C.W. designed, performed, and analysed all survivability assays and ATP  
488 luminescence-based assays, as well as performed the experiments in Figure 1 and 2 except for the  
489 mass spectrometry. C.W., K.S., J.T., and U.S. designed the mass spectrometry experiments. K.S., C.W.,  
490 and P.W. prepared extracts for mass spectrometry measurement (both metabolomics and  
491 lipidomics). K.S. and P.W. performed mass spectrometry measurements and analysed the resulting  
492 data.

493

## 494 References

- 495 1. Lauretti E, Li J-G, Di Meco A, Praticò D (2017) Glucose deficit triggers tau pathology and synaptic  
496 dysfunction in a tauopathy mouse model. *Transl Psychiatry* 7(1):e1020.
- 497 2. Leon MJ de, et al. (1983) Positron emission tomographic studies of aging and Alzheimer  
498 disease. *Am J Neuroradiol* 4(3):568–571.
- 499 3. O’Connor T, et al. (2008) Phosphorylation of the Translation Initiation Factor eIF2 $\alpha$  Increases  
500 BACE1 Levels and Promotes Amyloidogenesis. *Neuron* 60(6):988–1009.
- 501 4. Virgilio CD (2012) The essence of yeast quiescence. *FEMS Microbiol Rev* 36(2):306–339.
- 502 5. Ashe MP, De Long SK, Sachs AB (2000) Glucose Depletion Rapidly Inhibits Translation Initiation  
503 in Yeast. *Mol Biol Cell* 11(3):833–848.
- 504 6. Jona G, Choder M, Gileadi O (2000) Glucose starvation induces a drastic reduction in the rates  
505 of both transcription and degradation of mRNA in yeast. *Biochim Biophys Acta BBA - Gene*  
506 *Struct Expr* 1491(1):37–48.
- 507 7. Metztl-Raz E, et al. (2017) Principles of cellular resource allocation revealed by condition-  
508 dependent proteome profiling. *eLife* 6. doi:10.7554/eLife.28034.
- 509 8. Seo AY, et al. (2017) AMPK and vacuole-associated Atg14p orchestrate  $\mu$ -lipophagy for energy  
510 production and long-term survival under glucose starvation. *eLife* 6. doi:10.7554/eLife.21690.
- 511 9. Joyner RP, et al. (2016) A glucose-starvation response regulates the diffusion of  
512 macromolecules. *eLife* 5. doi:10.7554/eLife.09376.
- 513 10. Munder MC, et al. (2016) A pH-driven transition of the cytoplasm from a fluid- to a solid-like  
514 state promotes entry into dormancy. *eLife* 5:e09347.
- 515 11. Klosinska MM, Crutchfield CA, Bradley PH, Rabinowitz JD, Broach JR (2011) Yeast cells can  
516 access distinct quiescent states. *Genes Dev* 25(4):336–349.
- 517 12. Lang MJ, et al. (2014) Glucose Starvation Inhibits Autophagy via Vacuolar Hydrolysis and  
518 Induces Plasma Membrane Internalization by Down-regulating Recycling. *J Biol Chem*  
519 289(24):16736–16747.
- 520 13. Lefevre SD, Roermund CW van, Wanders RJA, Veenhuis M, Klei IJ van der (2013) The  
521 significance of peroxisome function in chronological aging of *Saccharomyces cerevisiae*. *Aging*  
522 *Cell* 12(5):784–793.
- 523 14. Link H, Fuhrer T, Gerosa L, Zamboni N, Sauer U (2015) Real-time metabolome profiling of the  
524 metabolic switch between starvation and growth. *Nat Methods* 12(11):1091–1097.
- 525 15. Sekar K, et al. (2018) Synthesis and degradation of FtsZ quantitatively predict the first cell  
526 division in starved bacteria. *Mol Syst Biol* 14(11):e8623.
- 527 16. Milo R, Jorgensen P, Moran U, Weber G, Springer M (2010) BioNumbers—the database of key  
528 numbers in molecular and cell biology. *Nucleic Acids Res* 38(Database issue):D750–D753.

- 529 17. Shaw LC, Lewin AS (1997) The Cbp2 protein stimulates the splicing of the omega intron of yeast  
530 mitochondria. *Nucleic Acids Res* 25(8):1597–1604.
- 531 18. Wilson WA, et al. (2010) Regulation of glycogen metabolism in yeast and bacteria. *FEMS*  
532 *Microbiol Rev* 34(6):952–985.
- 533 19. Thomsson E, et al. (2003) Carbon Starvation Can Induce Energy Deprivation and Loss of  
534 Fermentative Capacity in *Saccharomyces cerevisiae*. *Appl Environ Microbiol* 69(6):3251–3257.
- 535 20. Fuhrer T, Heer D, Begemann B, Zamboni N (2011) High-throughput, accurate mass metabolome  
536 profiling of cellular extracts by flow injection-time-of-flight mass spectrometry. *Anal Chem*  
537 83(18):7074–7080.
- 538 21. Link H, Kochanowski K, Sauer U (2013) Systematic identification of allosteric protein-metabolite  
539 interactions that control enzyme activity *in vivo*. *Nat Biotechnol* 31(4):357–361.
- 540 22. Rabinowitz JD, Kimball E (2007) Acidic acetonitrile for cellular metabolome extraction from  
541 *Escherichia coli*. *Anal Chem* 79(16):6167–6173.
- 542 23. Kanehisa M, et al. (2014) Data, information, knowledge and principle: back to metabolism in  
543 KEGG. *Nucleic Acids Res* 42(Database issue):D199–205.
- 544 24. Buescher JM, Moco S, Sauer U, Zamboni N (2010) Ultrahigh Performance Liquid  
545 Chromatography–Tandem Mass Spectrometry Method for Fast and Robust Quantification of  
546 Anionic and Aromatic Metabolites. *Anal Chem* 82(11):4403–4412.
- 547 25. Kormančíková V, Kováč L, Vidová M (1969) Oxidative phosphorylation in yeast. V.  
548 Phosphorylation efficiencies in growing cells determined from molar growth yields. *Biochim*  
549 *Biophys Acta BBA - Bioenerg* 180(1):9–17.
- 550 26. da Silveira dos Santos AX, et al. (2014) Systematic lipidomic analysis of yeast protein kinase and  
551 phosphatase mutants reveals novel insights into regulation of lipid homeostasis. *Mol Biol Cell*  
552 25(20):3234–3246.
- 553 27. Fahy E, et al. (2009) Update of the LIPID MAPS comprehensive classification system for lipids. *J*  
554 *Lipid Res* 50(Suppl):S9–S14.
- 555 28. Wei D, et al. (2012) High-resolution three-dimensional reconstruction of a whole yeast cell  
556 using focused-ion beam scanning electron microscopy. *BioTechniques* 53(1):41–48.
- 557 29. Kunau W-H, et al. (1987)  $\beta$ -Oxidation Systems in Eukaryotic Microorganisms. *Peroxisomes in*  
558 *Biology and Medicine*, Proceedings in Life Sciences., eds Fahimi HD, Sies H (Springer Berlin  
559 Heidelberg), pp 128–140.
- 560 30. Igual JC, Matallaná E, Gonzalez-Bosch C, Franco L, Pérez-Ortín JE (1991) A new glucose-  
561 repressible gene identified from the analysis of chromatin structure in deletion mutants of  
562 yeast SUC2 locus. *Yeast Chichester Engl* 7(4):379–389.
- 563 31. Barth H, Meiling-Wesse K, Epple UD, Thumm M (2001) Autophagy and the cytoplasm to vacuole  
564 targeting pathway both require Aut10p. *FEBS Lett* 508(1):23–28.
- 565 32. Adachi A, Koizumi M, Ohsumi Y (2017) Autophagy induction under carbon starvation conditions  
566 is negatively regulated by carbon catabolite repression. *J Biol Chem* 292(48):19905–19918.

- 567 33. Yi C, et al. (2017) Formation of a Snf1-Mec1-Atg1 Module on Mitochondria Governs Energy  
568 Deprivation-Induced Autophagy by Regulating Mitochondrial Respiration. *Dev Cell* 41(1):59-  
569 71.e4.
- 570 34. Sauer U, Eikmanns BJ (2005) The PEP–pyruvate–oxaloacetate node as the switch point for  
571 carbon flux distribution in bacteria. *FEMS Microbiol Rev* 29(4):765–794.
- 572 35. De Torrontegui G, Palacián E, Losada M (1966) Phosphoenolpyruvate carboxykinase in  
573 gluconeogenesis and its repression by hexoses. *Biochem Biophys Res Commun* 22(2):227–231.
- 574 36. Wilson WA, Hawley SA, Hardie DG (1996) Glucose repression/derepression in budding yeast:  
575 SNF1 protein kinase is activated by phosphorylation under derepressing conditions, and this  
576 correlates with a high AMP:ATP ratio. *Curr Biol CB* 6(11):1426–1434.
- 577 37. Hedbacker K, Carlson M (2008) SNF1/AMPK pathways in yeast. *Front Biosci J Virtual Libr*  
578 13:2408–2420.
- 579 38. Herbst DA, Townsend CA, Maier T (2018) The architectures of iterative type I PKS and FAS. *Nat*  
580 *Prod Rep* 35(10):1046–1069.
- 581 39. Kornfeld R, Kornfeld S (1985) Assembly of asparagine-linked oligosaccharides. *Annu Rev*  
582 *Biochem* 54:631–664.
- 583 40. Harada Y, et al. (2013) Metabolically programmed quality control system for dolichol-linked  
584 oligosaccharides. *Proc Natl Acad Sci U S A* 110(48):19366–19371.
- 585 41. Kukuruzinska M, Lennon K (1994) Growth-Related Coordinate Regulation of the Early N-  
586 Glycosylation Genes. *Glycobiology* 4(4):437–443.
- 587 42. Baudin A, Ozier-Kalogeropoulos O, Denouel A, Lacroute F, Cullin C (1993) A simple and efficient  
588 method for direct gene deletion in *Saccharomyces cerevisiae*. *Nucleic Acids Res* 21(14):3329–  
589 3330.
- 590 43. Bennett BD, Yuan J, Kimball EH, Rabinowitz JD (2008) Absolute quantitation of intracellular  
591 metabolite concentrations by an isotope ratio-based approach. *Nat Protoc* 3(8):1299–1311.

592

593

594

## 595 Figure legends

596  
597  
598  
599  
600  
601  
602  
603  
604  
605  
606

**Figure 1. The ability to respire is crucial for survival and energy maintenance upon acute glucose starvation. (a)** Relative ATP levels in the respiratory deficient *cbp2Δ* mutant compared to WT after 1 h of acute glucose starvation. Mean, standard deviation, and biological replicates are shown. Right panel: Survival after 1h, 3 days and 6 days of acute starvation **(b)** Change in ion intensity for metabolites after 0, 1, 2, 3, and 4 h of acute glucose starvation (red, glucose starved), compared to non-starved cells (blue, non-starved). Comparison between wild-type (WT) cells and *cbp2Δ* cells. Abbreviations: FBP - fructose bisphosphate, G6P – Glucose-6-phosphate, Glycerol P – Glycerol phosphate, GMP - guanosine monophosphate, Ms1P -mannose 1-phosphate , R5P – Ribose-5-phosphate, S7P - sedoheptulose-7-guanine, PEP – phosphoenolpyruvate. Average and standard error (error bar) of 2 biological replicates are shown.

**Figure 2. Extracellular aminoacids and intracellular glycogen levels are not the main short-term energy source upon acute glucose starvation (a)** Extracellular aspartate and methionine primarily deplete within the first 1 h of starvation. Wild-type and *cbp2Δ* mutants were grown in SCD (synthetic complete medium with glucose) and then switched to SCD or SC (synthetic complete medium without glucose). Extracellular samples were taken and measured for relative abundance of ions corresponding to aspartate and methionine. Error bars indicate the standard error of two biological replicates. **(b)** Survival of wild-type yeast cells after 18 h - 21 days of acute glucose and amino acid starvation (SC -AA) and acute starvation in water (H<sub>2</sub>O), compared to survival of cells only starved from glucose (SC) **(c)** ATP levels after hours and minutes of starvation in SC, SC-AA, or H<sub>2</sub>O. **(d)** ATP levels of *glg1Δglg2Δ* mutants compared to WT after 19 h of acute glucose starvation. **(e)** Quantified spotting assays after 2h-21 days of starvation. Mean and standard deviation and values of biological replicates are shown.

**Figure 3: Central carbon metabolites exhibit sub-minute changes to glucose deprivation. (a)** Fast filtration setup. Growing yeast (approximately 1 OD\*mL) were deposited onto filters and quickly perfused with pretreatment media (SCD). At the 0 second timepoint, cells were perfused with either SCD or SC (starvation) medium, and after exposure for a given amount of time (10 s, 20 s, 30 s, and 60 s), the filters were rapidly quenched in extraction solution and measured on mass spectrometry for small metabolites ( $m/z < 1000$  g/mol). **(b)** A metabolic map of central carbon metabolism shows rapid depletion of metabolites in upper glycolysis and increase in lipid synthesis. The log<sub>2</sub> change in ion intensity is shown between 60 s exposure of SC media versus the average of the 10 s and 30 s exposure on SCD media. **(c)** Glycolytic metabolites deplete strongly within 60 s upon exposure to SC media. The log<sub>2</sub> adjusted values of intensity for specific ions are shown and labeled according to the annotated compound. Measurement time indicates the exposure time for the given media for the cells on the filter (SCD - blue; SC -red; SC with Antimycin A - gray). 6 dots are shown for each timepoint (3 biological replicates and 2 technical measurement replicates). Timepoint 0 s is extrapolated from the average of the SCD condition. Error bars indicate the standard error for three biological replicates. Significances are shown between the SC and SC with Antimycin A condition for time 60 s (\* indicates  $0.01 < P < 0.05$ , \*\* for  $10^{-4} < P < 0.01$ , and \*\*\* for  $P < 10^{-4}$ ). **(d)** Measurement of other metabolites (dihydroxyacetone phosphate - DHAP, glyceraldehyde 3-phosphate - GAP, and fructose bisphosphate - FBP) with another mass spectrometer quantification method also corroborate the depletion of upper glycolysis metabolites. 2 dots are shown for each timepoint (2 biological replicates). Error bars indicate the standard error for two biological replicates. **(e)** ATP, ADP, and AMP levels as indicators of cellular energy homeostasis rapidly change during starvation.

**Figure 4. Unlike proteasomal activity, bulk autophagy contributes to survival and energy maintenance upon acute glucose starvation. (a)** ATP levels after 1 h of pre-treatment with MG132 or DMSO as a control, followed by 1 h in acute SC or SCD medium with MG132/DMSO. **(b)** ATP levels in *cbp2Δ* and *atg2Δ* relative to wild-type (WT) cells after 1 h and 19 h of acute glucose starvation. **(c)** Survival of *atg2Δ* cells after 2 h to 14 days of glucose starvation. Means, standard deviations and biological replicate values are shown. Significances are shown between the WT and mutants (ns indicates non-significant, \* indicates  $0.05 > P > 0.01$ , \*\* indicates  $0.01 > P > 0.001$ , \*\*\* indicates  $0.001 > P > 0.0001$ , and \*\*\*\* indicates  $P < 0.0001$ ). Significance was calculated using a one-way ANOVA test followed by a Holm-Sidak test.

**Figure 5. The lipidome during rapid starvation. (a)** Hexadecanoid acid and 3-Oxo-octanoyl-CoA as examples of lipid-related metabolites that accumulate within 10 to 60 seconds. The log<sub>2</sub> adjusted values of intensity for specific ions are shown and labeled according to the annotated compound. Measurement time indicates the exposure time for the given media for the cells on the filter (SCD - blue; SC -red). 6 dots are shown for each timepoint (3 biological replicates and 2 technical measurement replicates). Timepoint 0 s is extrapolated from the average of the SCD condition. Error bars indicate the standard error for three biological replicates. **(b)** Experimental set up for measuring yeast lipidomics upon starvation entry. Exponentially growing yeast cells (OD 0.8 in SCD media), were sampled (time point 0 min), and then resuspended into fresh SCD or SC media. Samples were taken every 10 minutes thereafter. All samples were processed (see Methods) and measured. Putative lipids were annotated based on  $m/z$  and correspondence to the LIPIDMAPS database. **(c)** The

654 normalized distribution of annotated lipids using the LIPIDMAPS identifiers. The major 8 lipid categories are shown. Error  
655 bars indicate the standard error between two biological replicates. **(d)** The lipid classes linear polyketides (PK01) and  
656 dolichols (PR0307) were identified as accumulating in glucose starvation compared to nutrient rich conditions. Error bars  
657 indicate the standard error between two biological replicates.

658  
659 **Figure 6. Lipid degradation and autophagy ensure survival and energy maintenance upon acute glucose starvation. (a)**  
660 ATP levels in mutants compared to wild-type cells (WT) after 1 h or 19 h of acute glucose starvation. **(b)** Survival of *atg14Δ*  
661 and *pot1Δ* cells after 2 h - 14 days of acute glucose starvation. **(c)** Survival of mutant cells compared to wild-type (WT) cells  
662 after 14 days of acute glucose starvation. Significances are shown between the WT and mutants (ns indicates non-  
663 significant, \* indicates  $0.05 > P > 0.01$ , \*\* indicates  $0.01 > P > 0.001$ , \*\*\* indicates  $0.001 > P > 0.0001$ , and \*\*\*\* indicates  $P <$   
664  $0.0001$ ). Significance was calculated using a one-way ANOVA test followed by a Holm-Sidak test.

665  
666 **Figure S1. Relative change in energy charges during starvation.** Change in ion intensity for ATP, ADP, and AMP after 0, 1, 2,  
667 3, and 4 h of acute glucose starvation (red, glucose starved), compared to non-starved cells (blue, non-starved). Comparison  
668 between wild-type (WT) and *cbp2Δ* cells. Average and standard error (error bar) of 2 biological replicates are shown.

669  
670 **Figure S2.** Survival of wild-type yeast cells after 18 h - 21 days of acute glucose starvation (SC), acute glucose and amino acid  
671 starvation (SC-AA), and acute starvation in water (H<sub>2</sub>O). 3 biological replicates (WT 1, WT 2, WT 3) and two technical  
672 replicates are shown.

673  
674 **Figure S3. Additional measured ions during rapid starvation.** The log<sub>2</sub> adjusted values of intensity for specific ions are  
675 shown and labeled according to the annotated compound. Measurement time indicates the exposure time for the given  
676 media for the cells on the filter (SCD - blue; SC -red; SC with Antimycin A - gray). 6 dots are shown for each timepoint (3  
677 biological replicates and 2 technical measurement replicates). Timepoint 0 s is extrapolated from the average of the SCD  
678 condition. Error bars indicate the standard error for three biological replicates.

679  
680 **Figure S4.** Survival assays after 2 h – 21 days of acute glucose starvation. 3-4 biological replicates are shown.

681  
682



683 **Supplementary Information**

684 **Supplementary Data 1: All metabolomics data**

685

686 **Supplementary Table 1: Strains used in this study.**

| Strain                    | Genotype                                                                            | Source     |
|---------------------------|-------------------------------------------------------------------------------------|------------|
| KWY165                    | W303 MAT A <i>his3-11,15 ura3-1 leu2-3 trp1-1 ade2-1</i>                            | (9)        |
| KWY8358                   | W303 MAT A <i>his3-11,15 ura3-1 leu2-3 trp1-1 ade2-1 cbp2Δ::KanMX6</i>              | This Study |
| KWY7617                   | W303 MAT A <i>his3-11,15 ura3-1 leu2-3 trp1-1 ade2-1 pot1Δ::KanMx6</i>              | This Study |
| KWY8357                   | W303 MAT A <i>his3-11,15 ura3-1 leu2-3 trp1-1 ade2-1 atg2Δ::KanMX6</i>              | This Study |
| KWY8722                   | W303 MAT A <i>his3-11,15 ura3-1 leu2-3 ade2-1 atg2Δ::KanMX6 pot1Δ::TRP</i>          | This Study |
| KWY8779                   | W303 MAT A <i>his3-11,15 ura3-1 leu2-3 ade2-1 pot1Δ::KanMX6 atg2Δ::TRP</i>          | This Study |
| KWY8140                   | W303 MATa <i>his3-11,15 ura3-1 leu2-3 trp1-1 ade2-1 glg1Δ::HygNT1 glg2Δ::KanMX6</i> | This Study |
| KWY8794, KWY8795, KWY8796 | W303 MAT A <i>his3-11,15 ura3-1 leu2-3 trp1-1 ade2-1 atg14Δ::KanMX6</i>             | This Study |
| KWY8776, KWY8777, KWY8778 | MAT A <i>15 ura3-1 leu2-3 trp1-1 ade2-1 Δpdr5::HIS</i>                              | This Study |

687

688 **Supplementary Table 2:**

|                                                               |      |
|---------------------------------------------------------------|------|
|                                                               | mg/l |
| Adenine, Arginine, Histidine, Methionine, Tryptophane, Uracil | 20   |
| Lysine, Thyrosine                                             | 30   |
| Phenylalanine                                                 | 50   |
| Leucine                                                       | 60   |
| Threonine                                                     | 200  |



# Figure 1

**a**

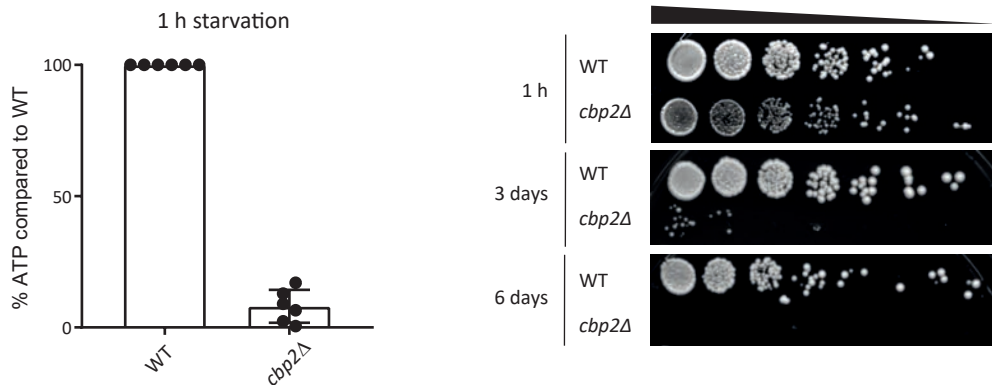

**b**

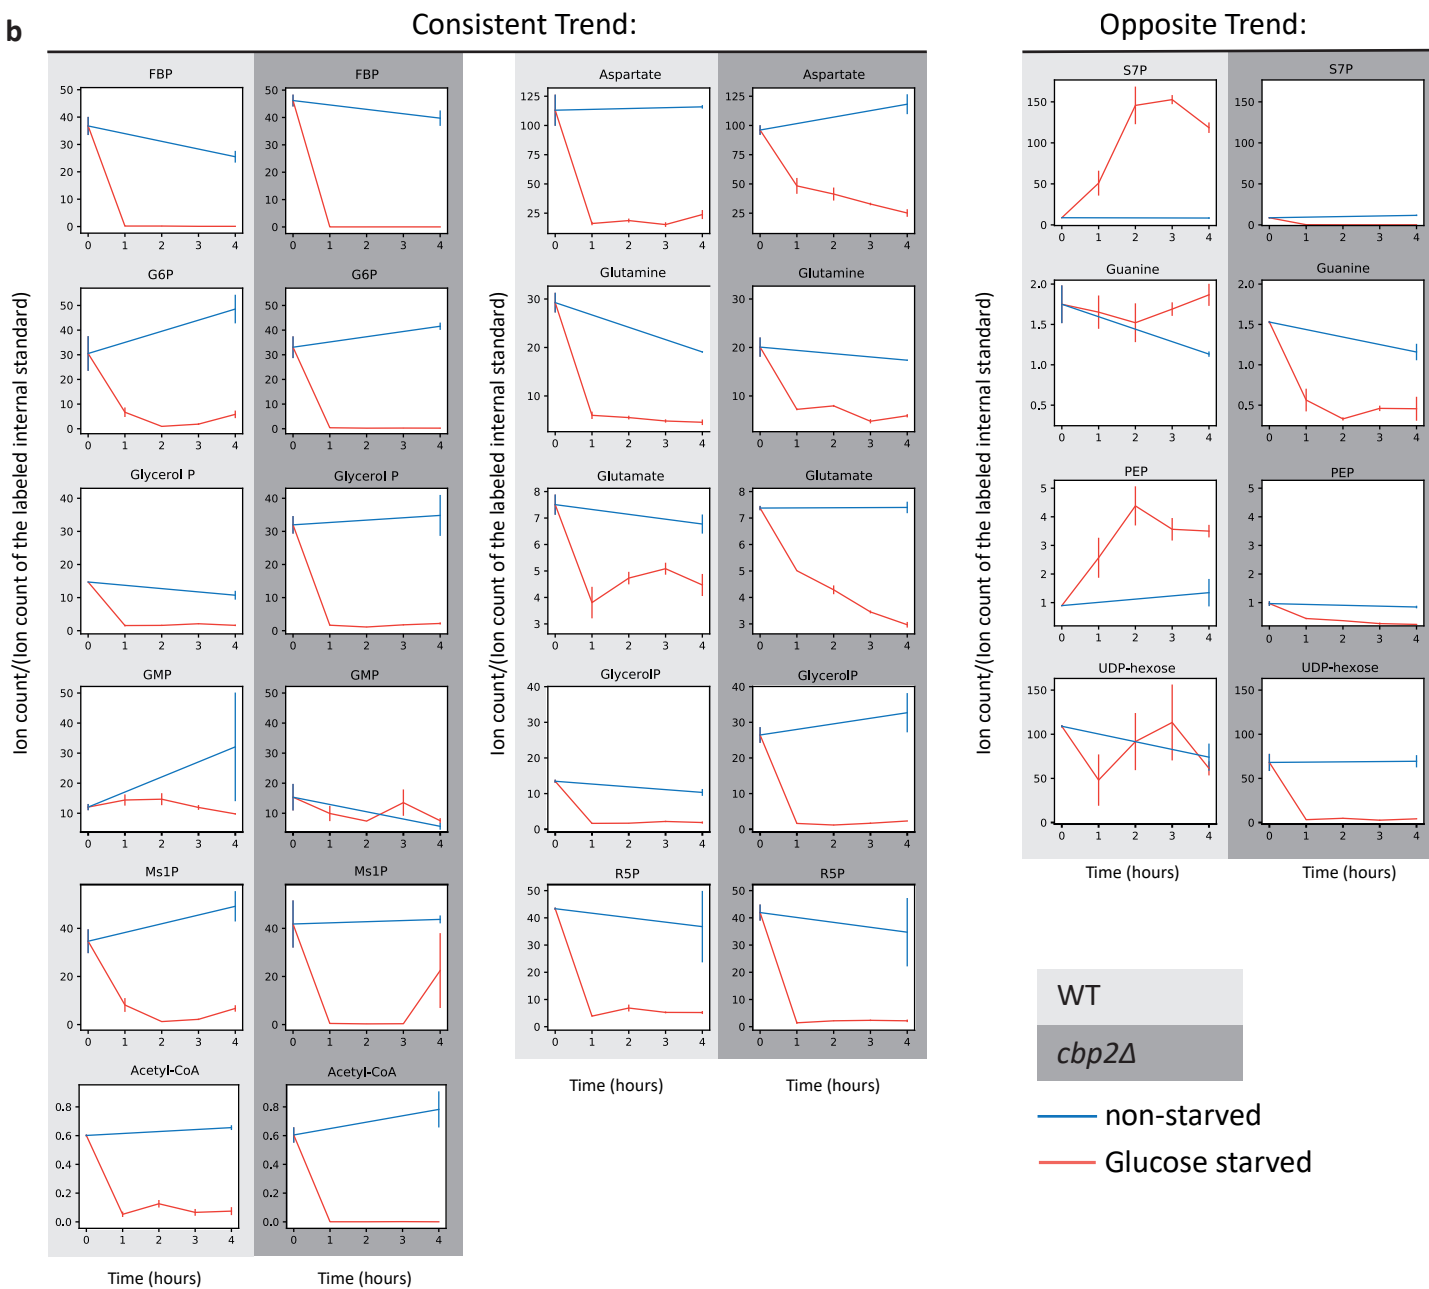

**Figure 2**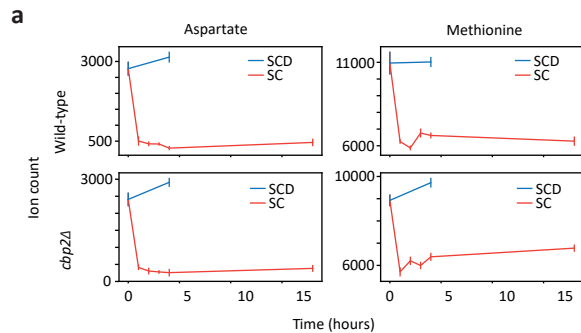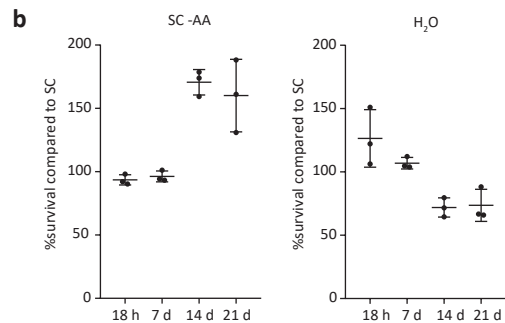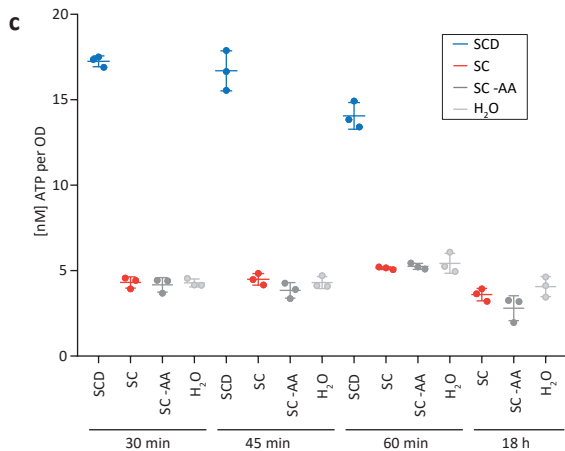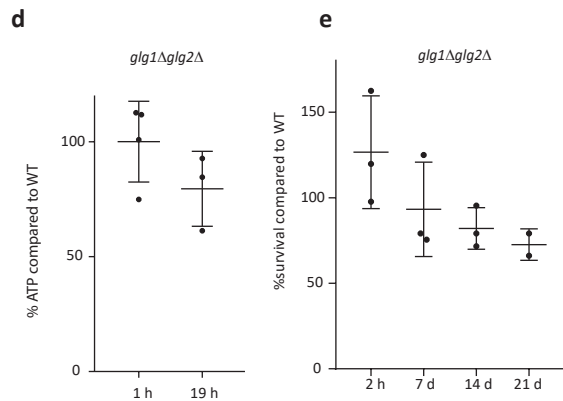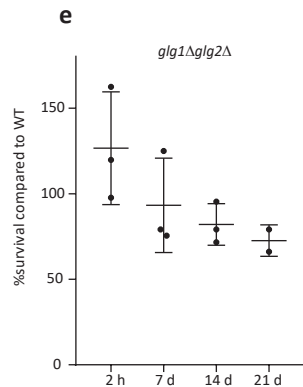

**Figure 3****a**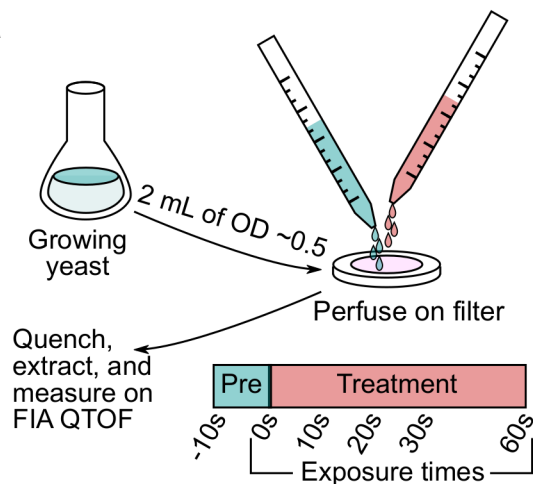**b**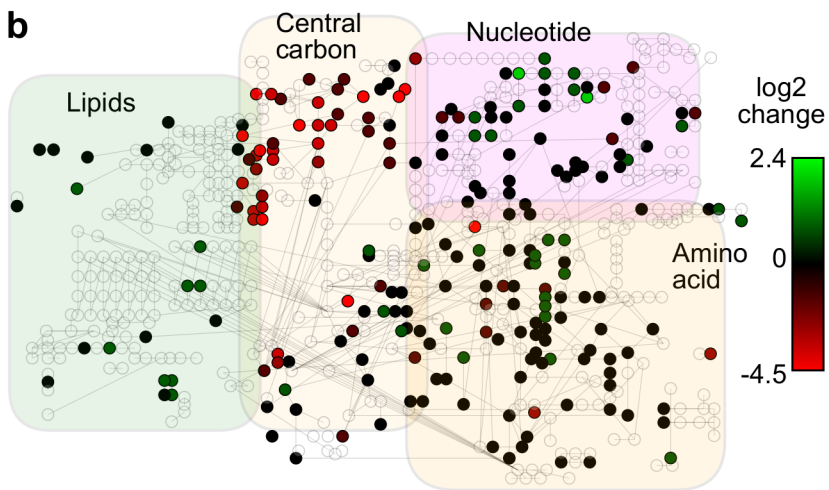**c**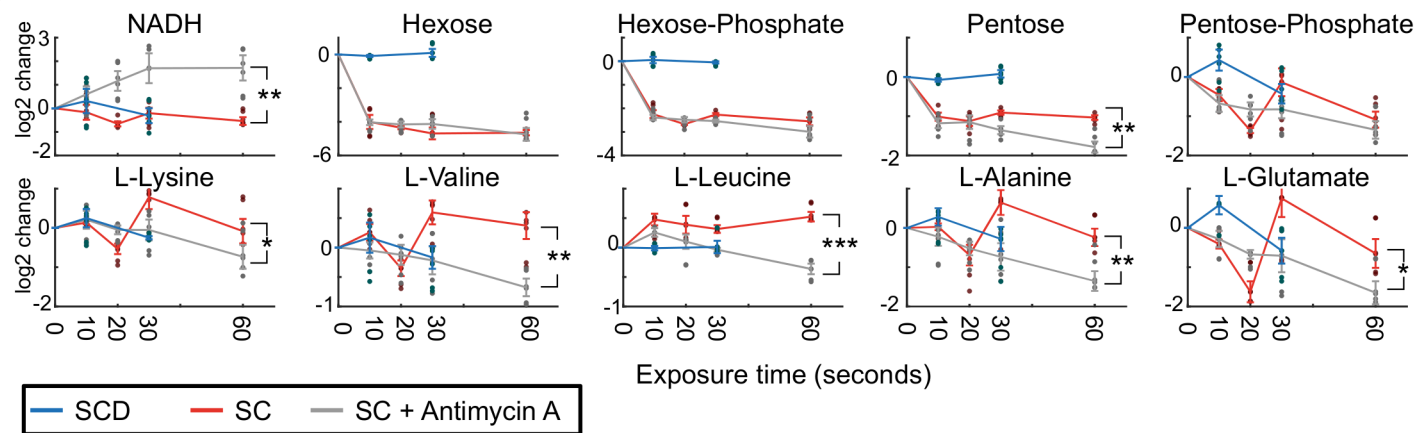**d**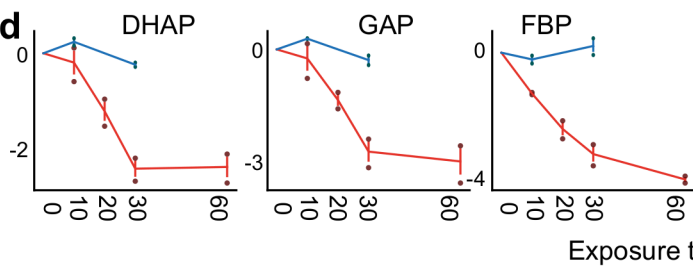**e**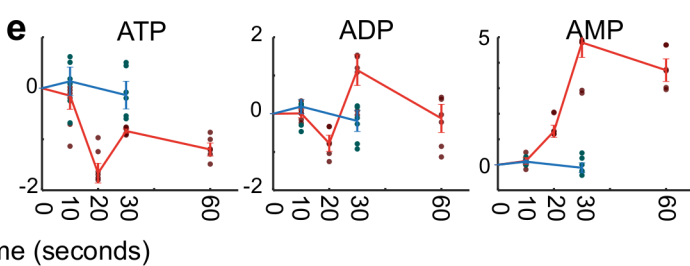

# Figure 4

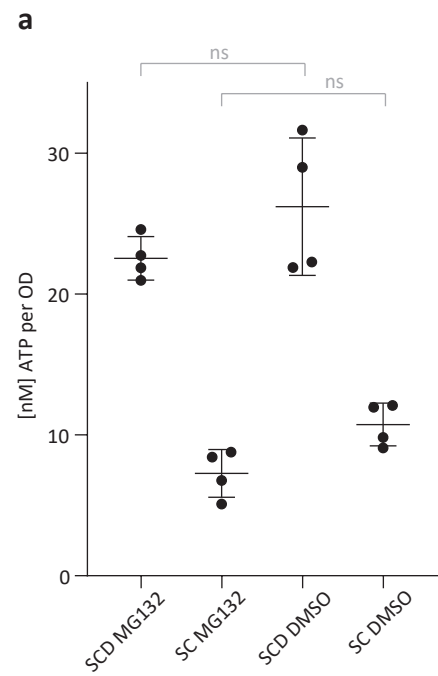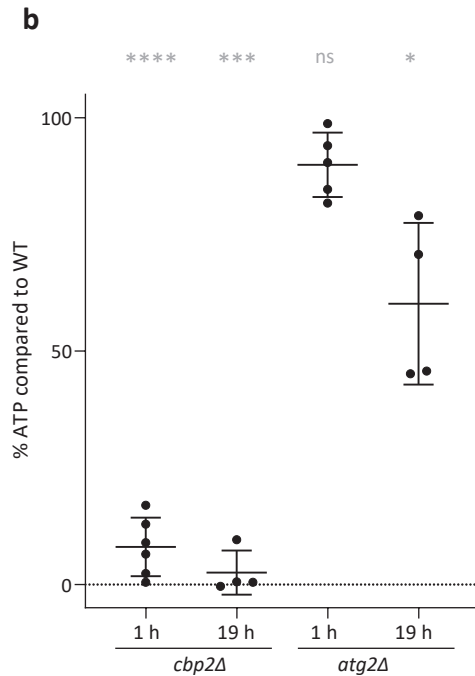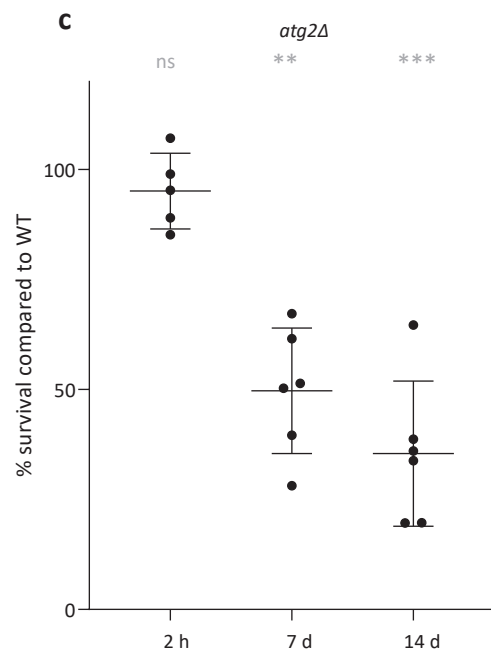

**Figure 5**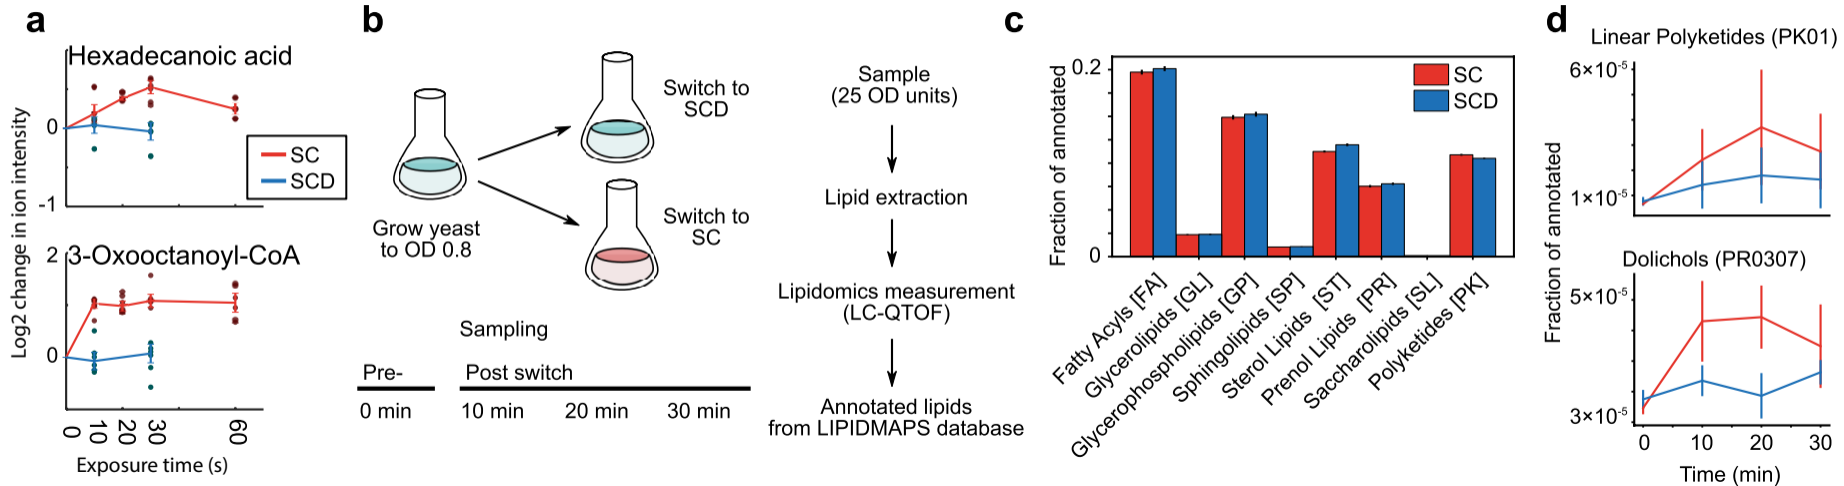

**Figure 6****a**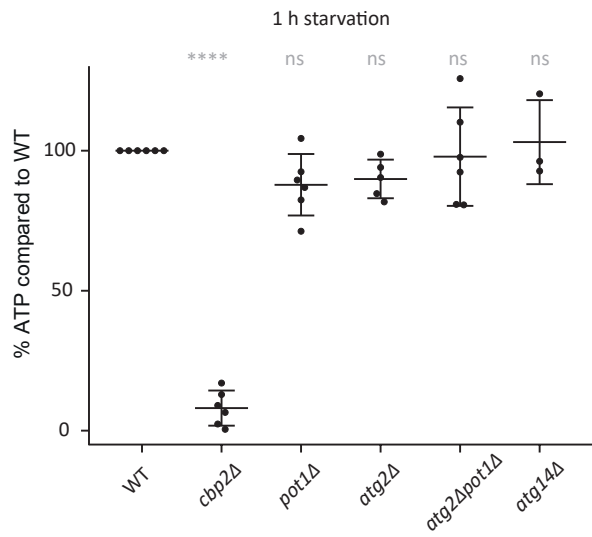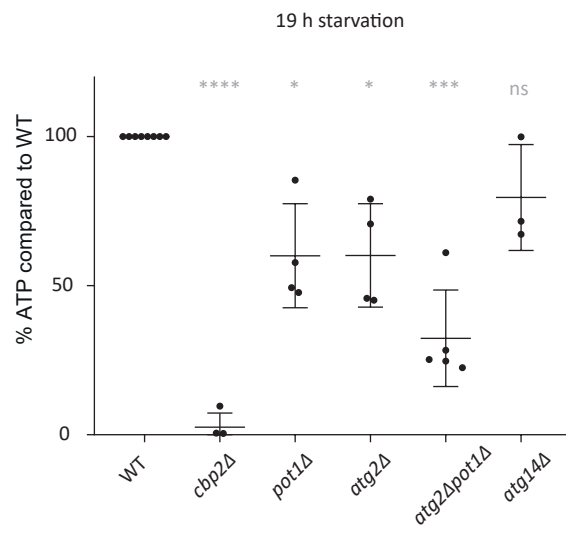**b**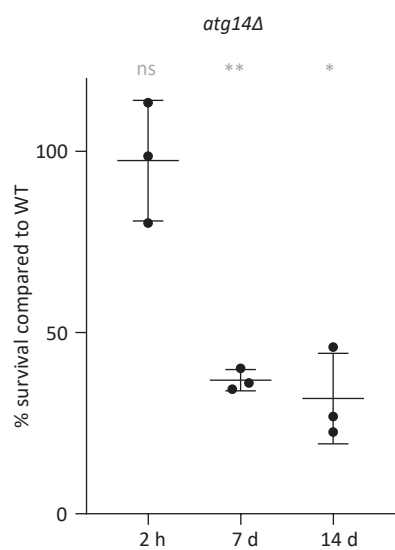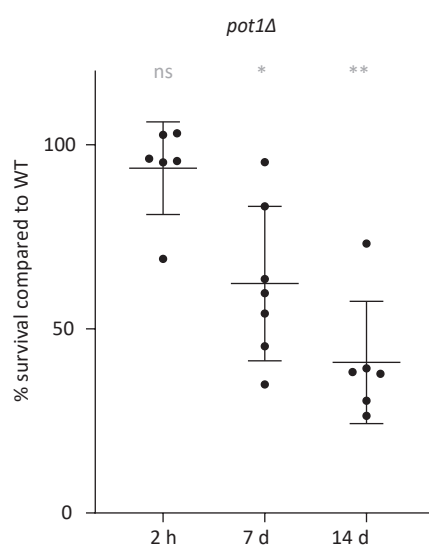**c**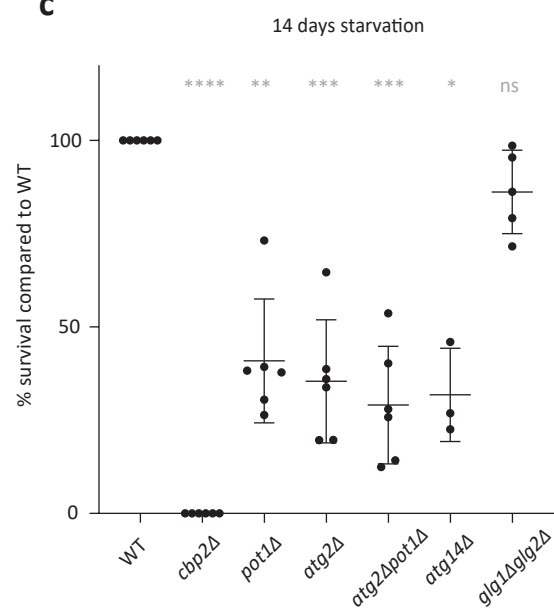

**Figure S1**

*WT*

*cbp2Δ*

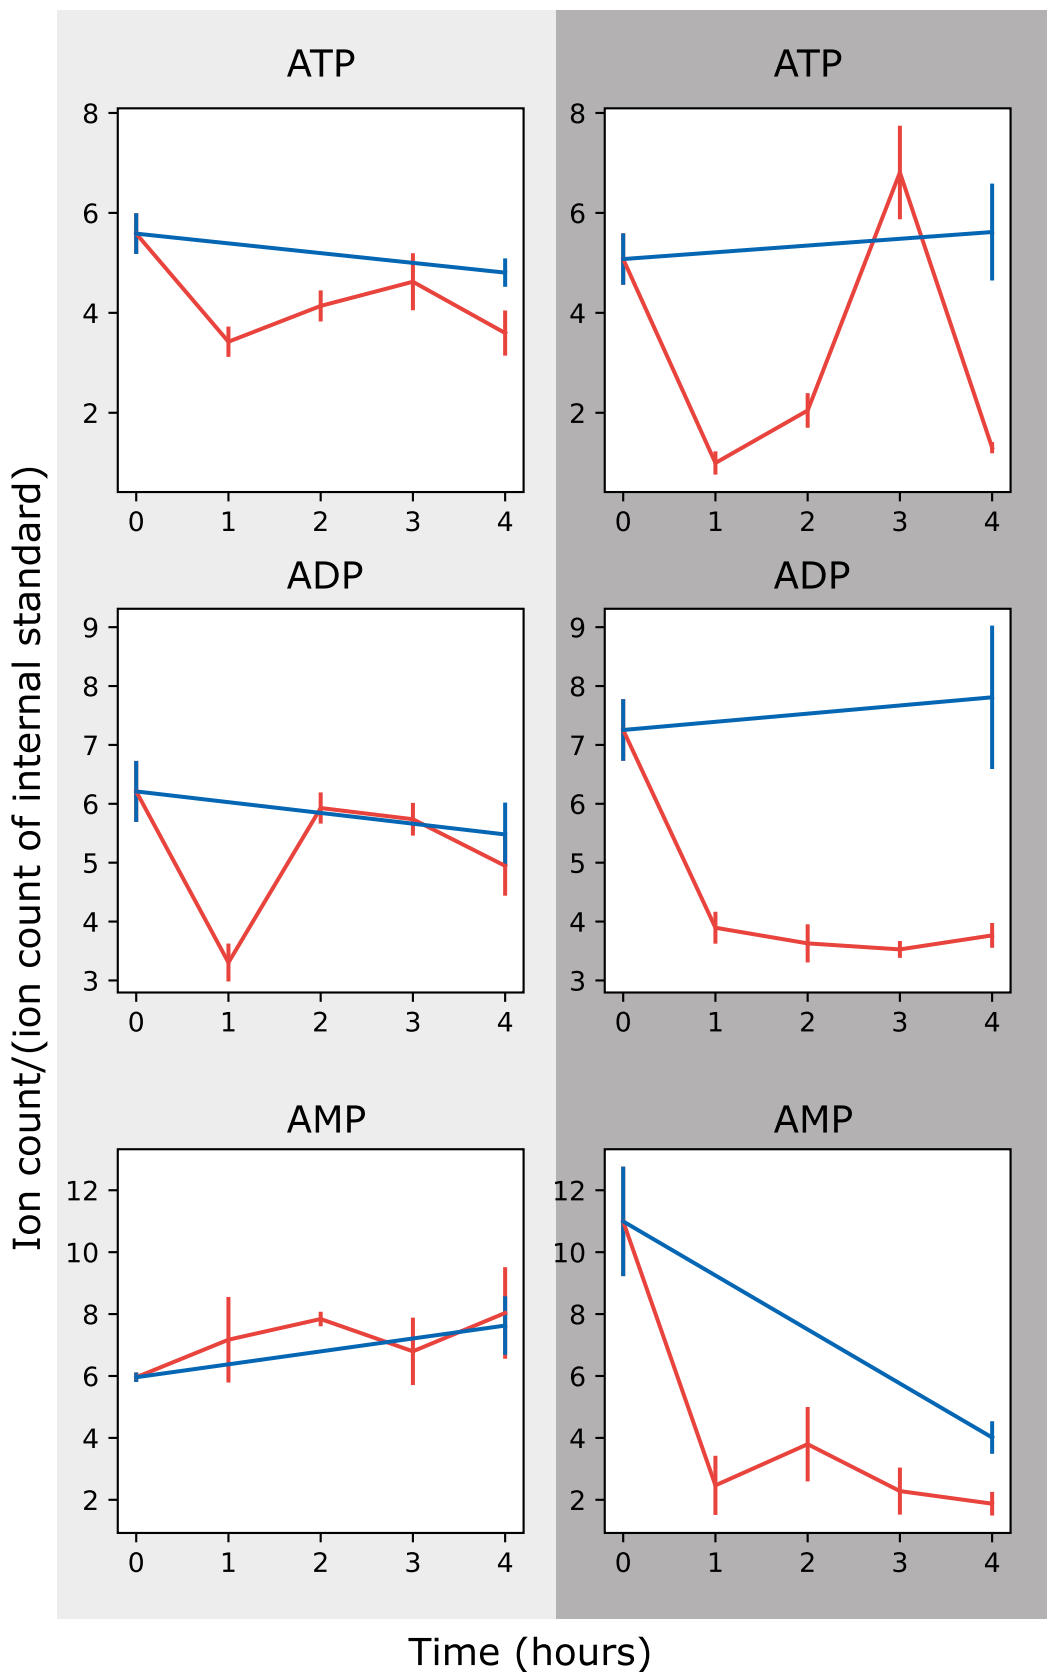

— non-starved  
— glucose starved



# Figure S2

18 h

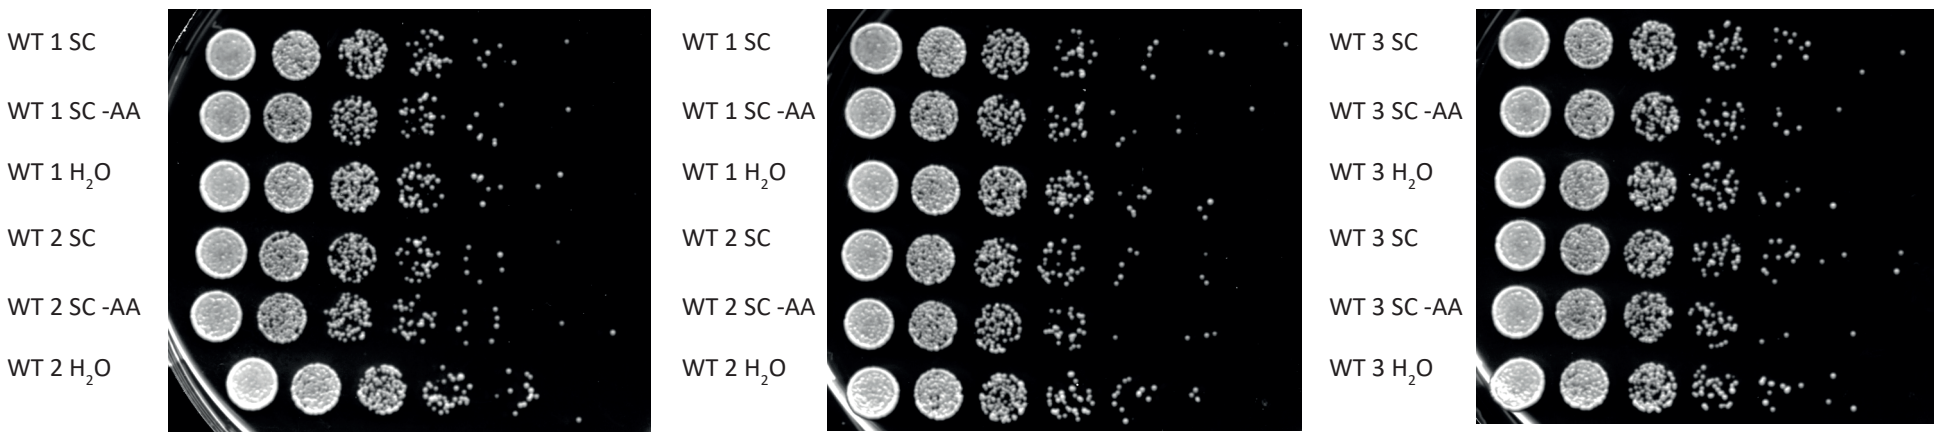

7 days

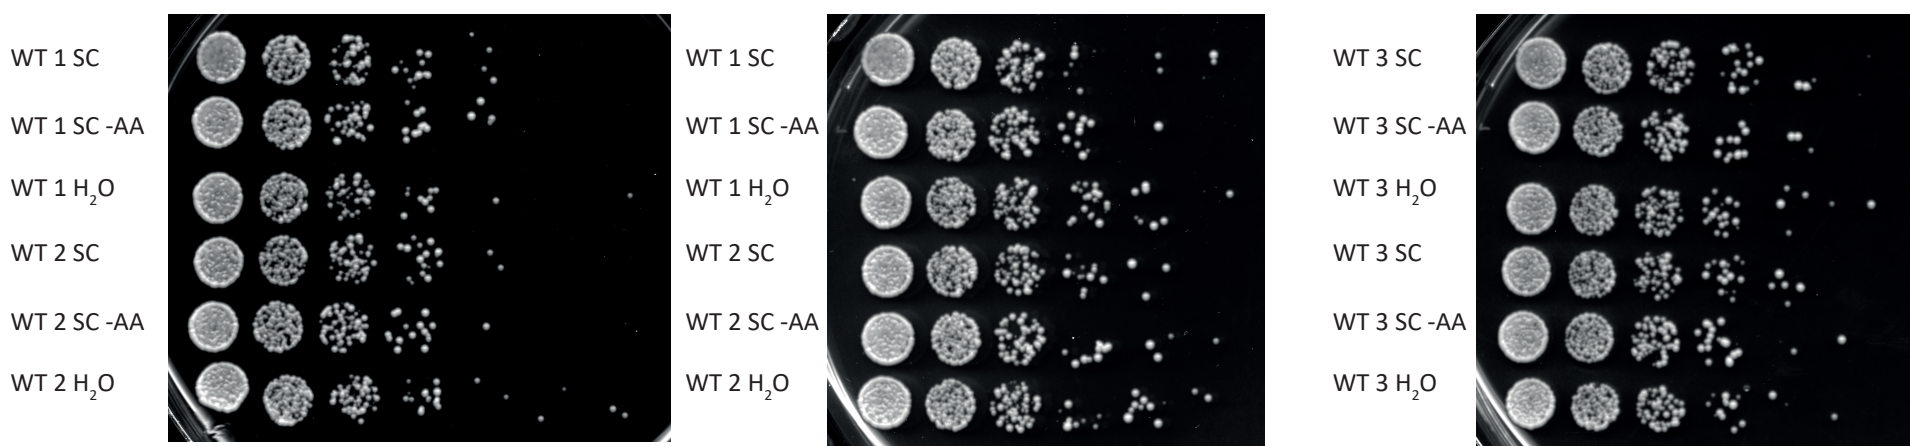

14 days

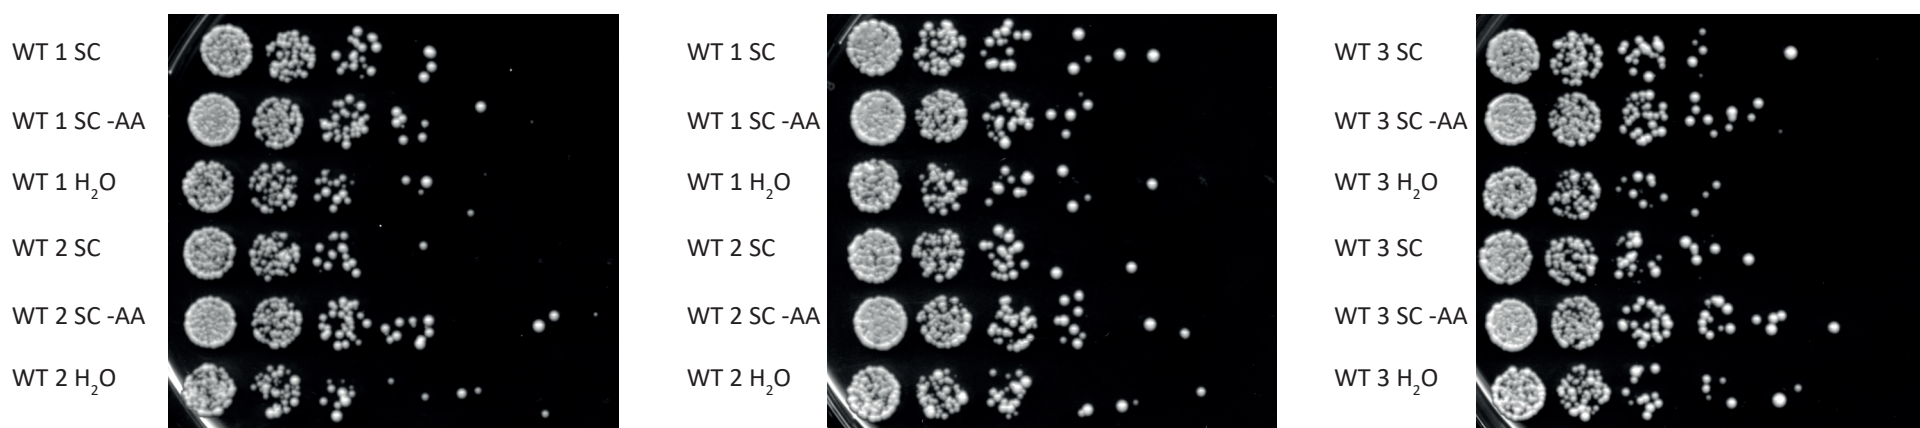

21 days

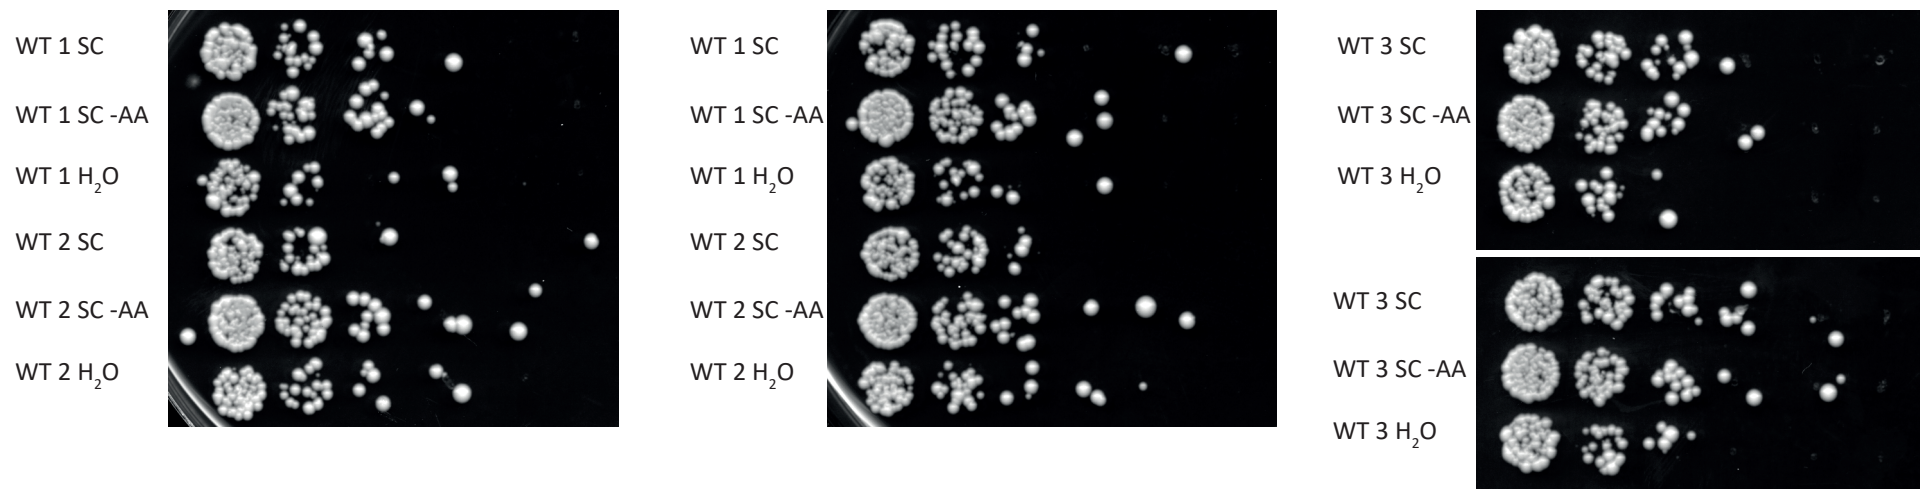



Figure S3

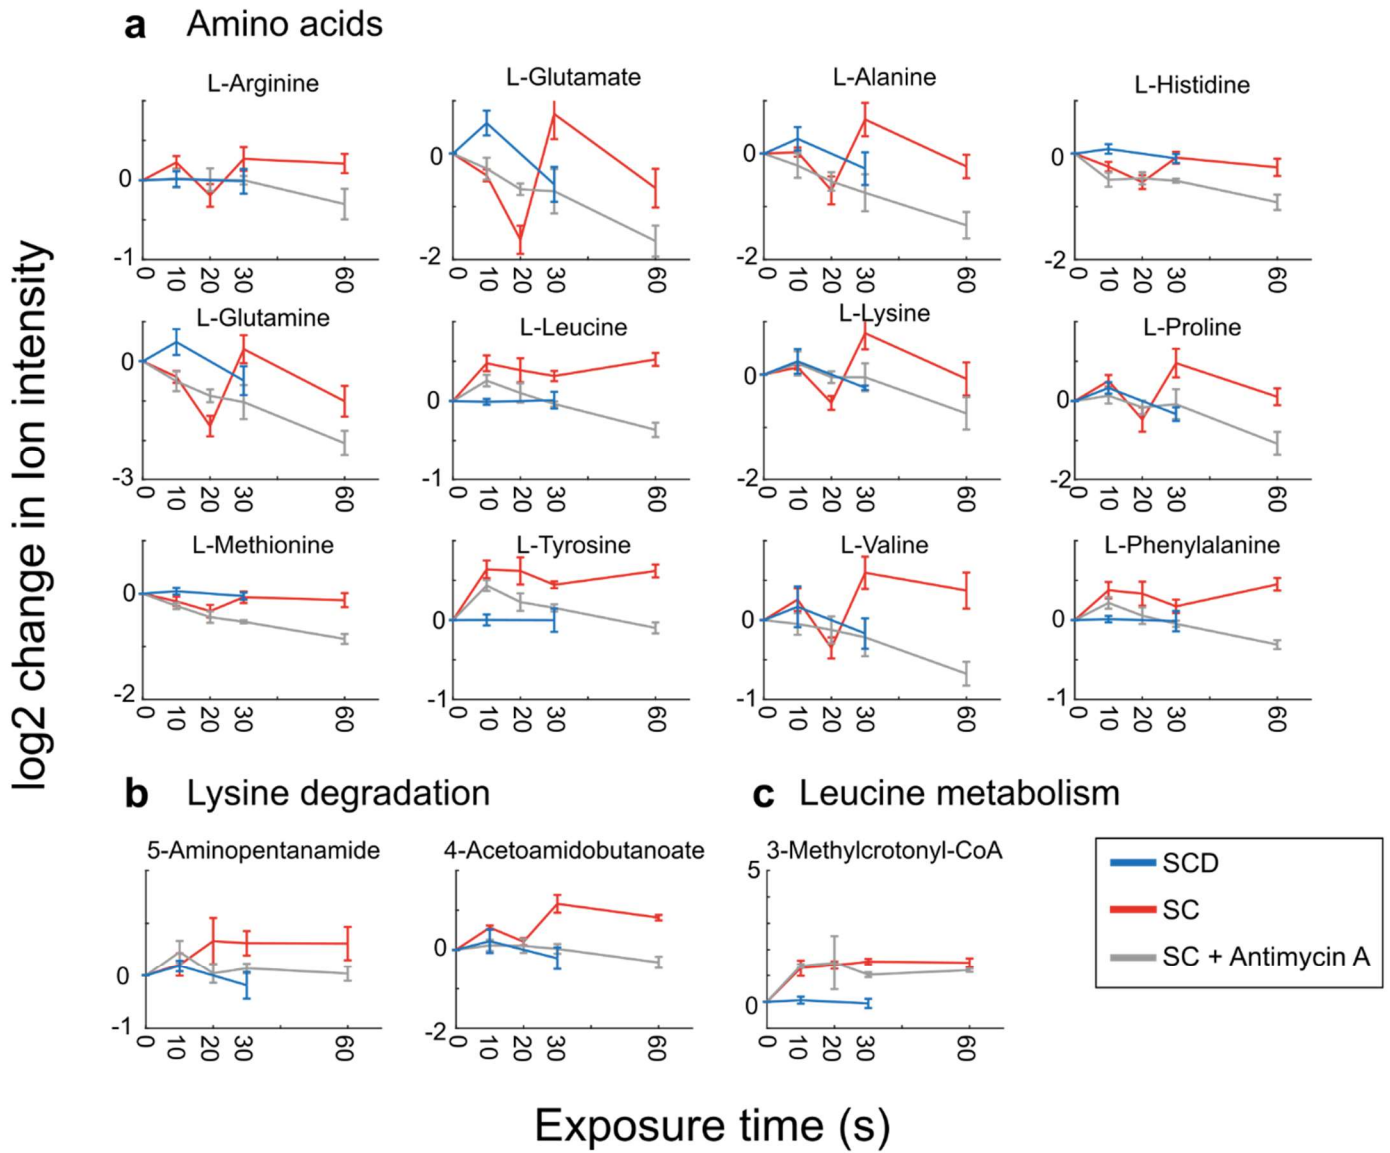



# Figure S4

2 h

biol. replicate 1

biol. replicate 2

biol. replicate 3

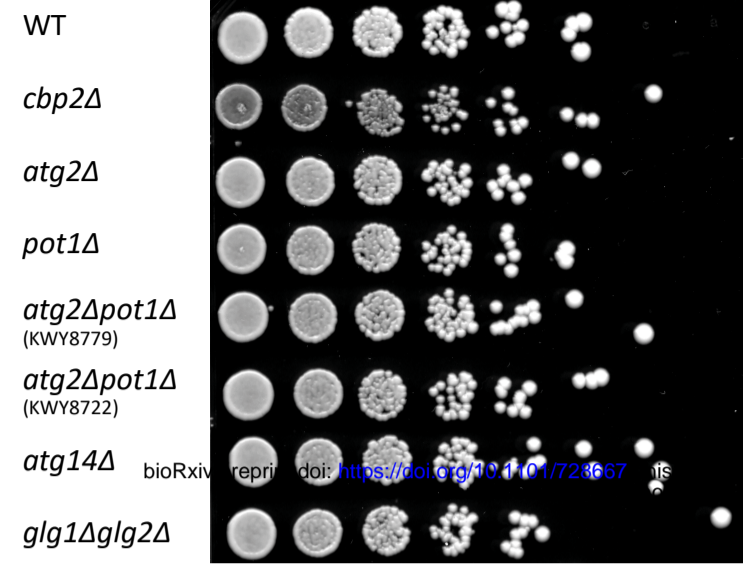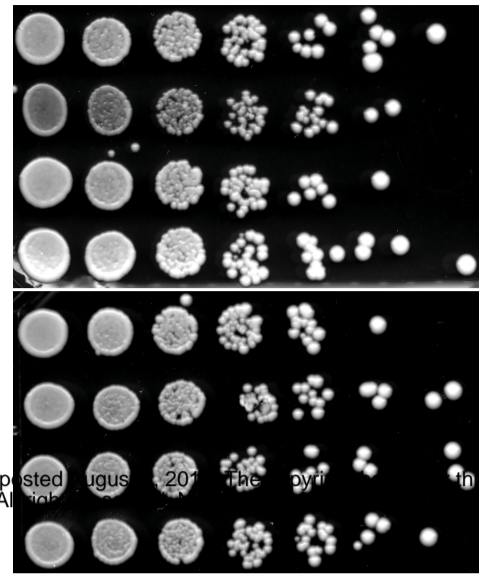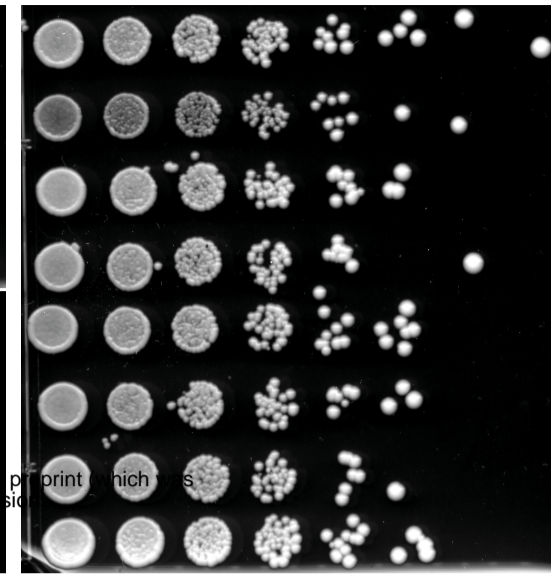

7 days

biol. replicate 1

biol. replicate 2

biol. replicate 3

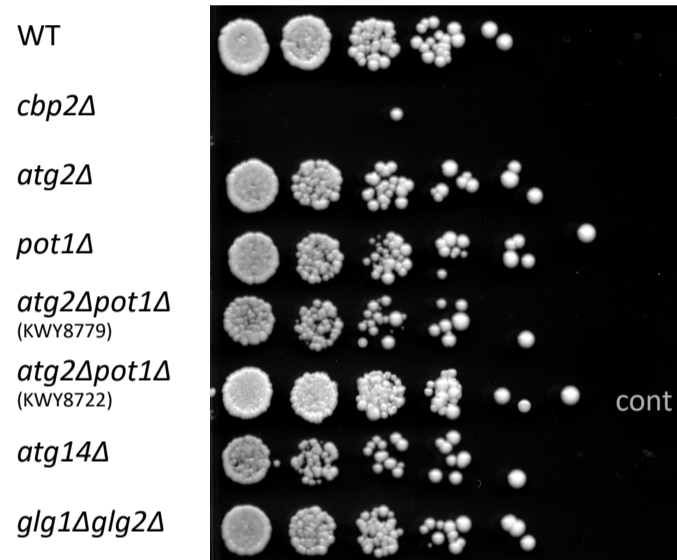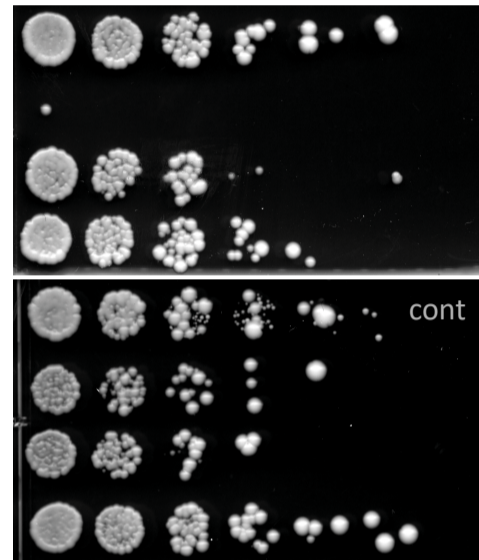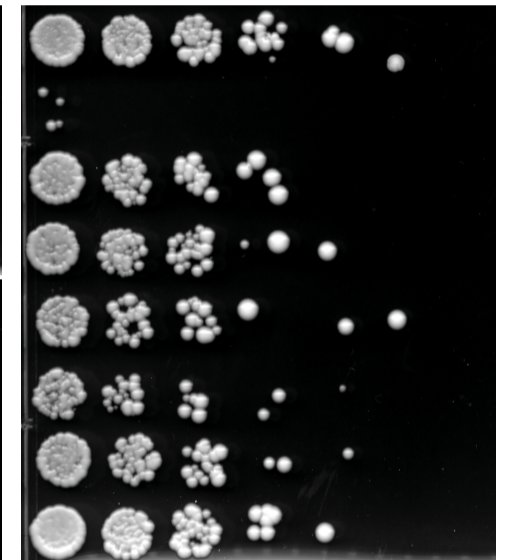

14 days

biol. replicate 1

biol. replicate 2

biol. replicate 3

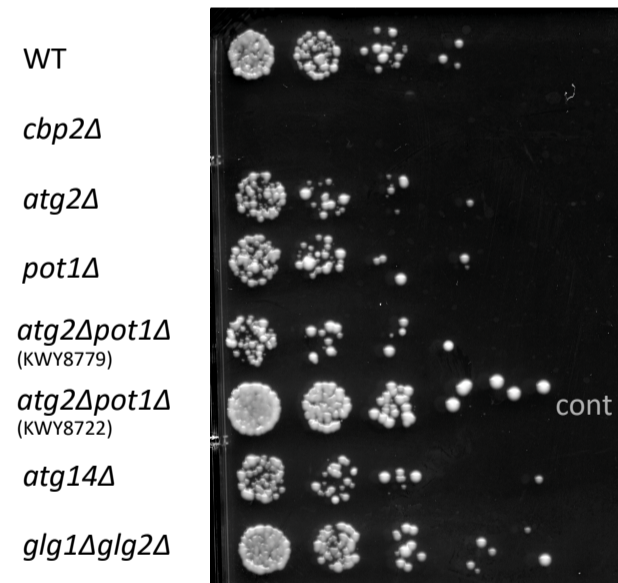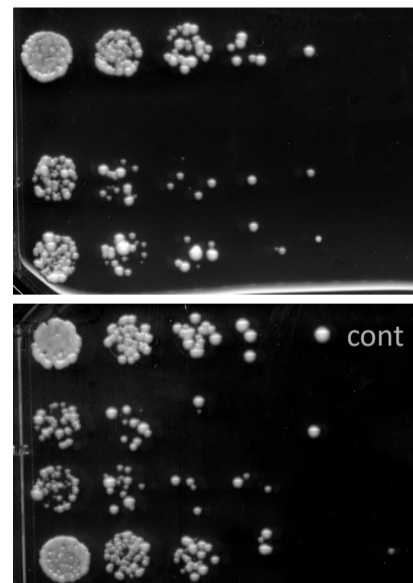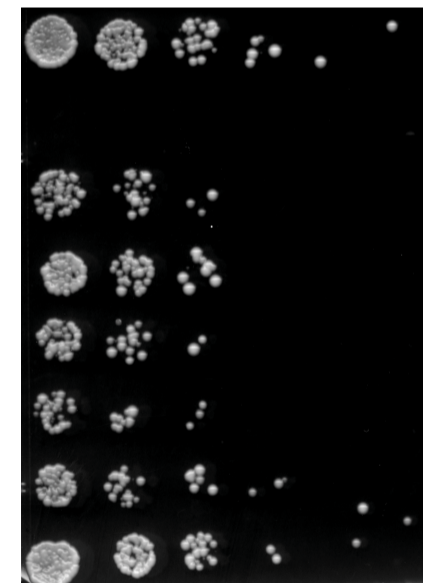

21 days

biol. replicate 1

biol. replicate 2

biol. replicate 3

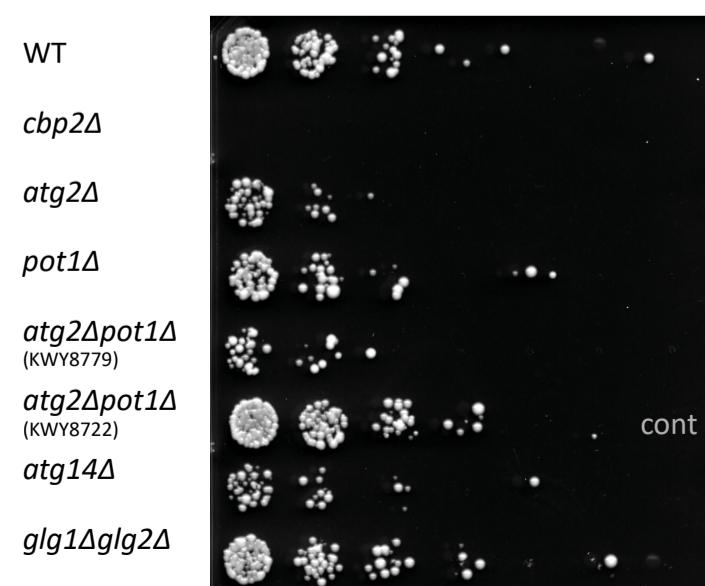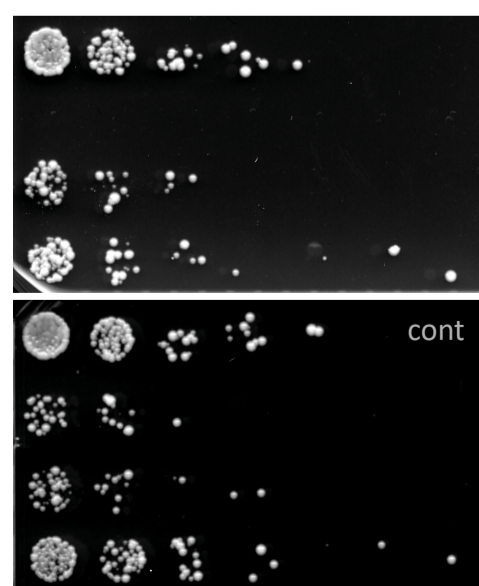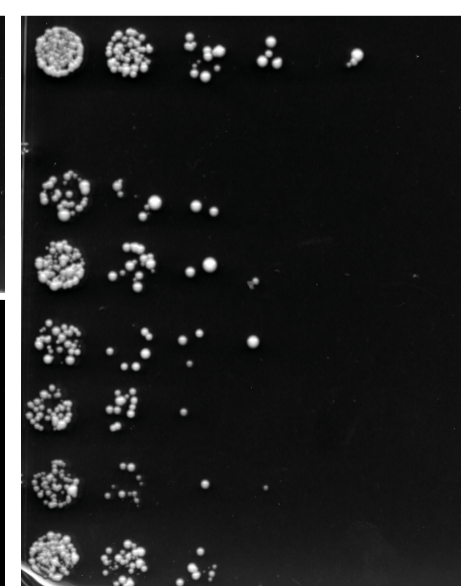

cont = contaminated sample, removed from all analyses
